# Supplementary material for: Asperspiropene A, a novel fungal metabolite as an inhibitor of cancer-associated mutant isocitrate dehydrogenase 1
Source: Royal Society of Chemistry journal article supplement (doi:10.1039/c6qo00847j), 2017-01-01

## Supporting Information

### Asperspiropene A, a Novel Fungal Metabolite as an Inhibitor of Cancer

#### Associated Mutant Isocitrate Dehydrogenase 1

Yan He,<sup>†,‡</sup> Mengzhu Zheng,<sup>†,‡</sup> Qin Li,<sup>†,‡</sup> Zhengxi Hu,<sup>†</sup> Hucheng Zhu,<sup>†</sup> Junjun Liu,<sup>†</sup> Jianping Wang,<sup>†</sup>

Yongbo Xue,<sup>\*,†</sup> Hua Li<sup>\*,†</sup> and Yonghui Zhang<sup>\*†</sup>

<sup>†</sup> Hubei Key Laboratory of Natural Medicinal Chemistry and Resource Evaluation, School of Pharmacy, Tongji

Medical College, Huazhong University of Science and Technology, Wuhan 430030, China.

*\*Corresponding author.*

\* Tel./fax: +86-027-83692892

*Emails:* zhangyh@mails.tjmu.edu.cn (Y. Z.)

li\_hua@mail.hust.edu.cn (H. L.)

yongboxue@mail.hust.edu.cn (Y.X.)

## Contents of Supporting Information

| No. | Contents                                                                                                                              | P.   |
|-----|---------------------------------------------------------------------------------------------------------------------------------------|------|
| 1   | Table S1. NMR Spectroscopic Data for compound <b>1</b>                                                                                | 3    |
| 2   | Detailed structure elucidation of 2D NMR data of compound <b>1</b>                                                                    | 3-4  |
| 3   | Table S2. Antiproliferative activity of compounds <b>1–4</b> in a panel of human cancer cell lines and WI-38 fibroblast normal cells. | 4    |
| 4   | Table S3-S6. Calculated ECD data for compound <b>1</b>                                                                                | 5-18 |
| 5   | Table S7. Calculated $^{13}\text{C}$ NMR data for compound <b>1</b>                                                                   | 19   |
| 6   | Figure S1 MST test for compounds <b>1–4</b> and AGI-5198                                                                              | 20   |
| 7   | Figure S2. $^1\text{H}$ NMR spectrum of compound <b>1</b> (Recorded in $\text{DMSO-}d_6$ )                                            | 21   |
| 8   | Figure S3. $^{13}\text{C}$ NMR spectrum of compound <b>1</b> (Recorded in $\text{DMSO-}d_6$ )                                         | 21   |
| 9   | Figure S4. HMQC spectrum of compound <b>1</b> (Recorded in $\text{DMSO-}d_6$ )                                                        | 22   |
| 10  | Figure S5. HMBC spectrum of compound <b>1</b> (Recorded in $\text{DMSO-}d_6$ )                                                        | 22   |
| 11  | Figure S6. $^1\text{H}$ $^1\text{H}$ COSY spectrum of compound <b>1</b> (Recorded in $\text{DMSO-}d_6$ )                              | 23   |
| 12  | Figure S7. NOESY spectrum of compound <b>1</b> (Recorded in $\text{DMSO-}d_6$ )                                                       | 23   |
| 13  | Figure S8. HRESIMS spectrum of compound <b>1</b> (Recorded in $\text{DMSO-}d_6$ )                                                     | 24   |
| 14  | Figure S9. UV spectrum of compound <b>1</b>                                                                                           | 24   |
| 15  | Figure S10. IR spectrum of compound <b>1</b>                                                                                          | 25   |
| 16  | Figure S11. $^1\text{H}$ NMR spectrum of compound <b>2</b> (Recorded in $\text{DMSO-}d_6$ )                                           | 25   |
| 17  | Figure S12. $^{13}\text{C}$ NMR spectrum of compound <b>2</b> (Recorded in $\text{DMSO-}d_6$ )                                        | 26   |
| 18  | Figure S13. HRESIMS spectrum of compound <b>2</b>                                                                                     | 26   |
| 19  | Figure S14. $^1\text{H}$ NMR spectrum of compound <b>3</b> (Recorded in $\text{CD}_3\text{OD}$ )                                      | 27   |
| 20  | Figure S15. $^{13}\text{C}$ NMR spectrum of compound <b>3</b> (Recorded in $\text{CD}_3\text{OD}$ )                                   | 27   |
| 21  | Figure S16. HRESIMS spectrum of compound <b>3</b>                                                                                     | 28   |
| 22  | Figure S17. $^1\text{H}$ NMR spectrum of compound <b>4</b> (Recorded in $\text{DMSO-}d_6$ )                                           | 28   |
| 23  | Figure S18. $^{13}\text{C}$ NMR spectrum of compound <b>4</b> (Recorded in $\text{DMSO-}d_6$ )                                        | 29   |
| 24  | Figure S19. HRESIMS spectrum of compound <b>4</b>                                                                                     | 29   |

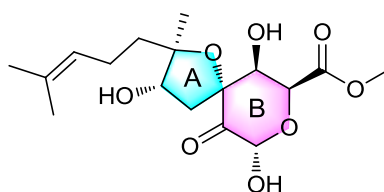

**1 (Asperspiropene A)**

**Table S1.** NMR Spectroscopic Data for compound **1**<sup>a</sup>

| NO. | $\delta_{\text{H}}$ ( <i>J</i> in Hz) | $\delta_{\text{C}}$ | DEPT            |
|-----|---------------------------------------|---------------------|-----------------|
| 2   |                                       | 85.2                | C               |
| 3   | 3.95 dd (13.8, 7.4)                   | 74.4                | CH              |
| 4a  | 2.16 dd (13.0, 7.1)                   |                     |                 |
| 4b  | 2.36 dd (13.0, 8.5)                   | 34.7                | CH <sub>2</sub> |
| 5   |                                       | 82.7                | C               |
| 6   |                                       | 195.7               | C               |
| 7   | 5.24 s                                | 99.2                | CH              |
| 9   | 4.51 s                                | 66.6                | CH              |
| 10  | 3.70 s                                | 75.0                | CH              |
| 11  | 1.39 m                                | 40.1                | CH <sub>2</sub> |
| 12  | 1.93 m                                | 22.2                | CH <sub>2</sub> |
| 13  | 5.07 t (7.11)                         | 124.7               | CH              |
| 14  |                                       | 130.7               | C               |
| 15  | 1.62 s                                | 25.6                | CH <sub>3</sub> |
| 16  | 1.55 s                                | 17.6                | CH <sub>3</sub> |
| 17  | 0.91 s                                | 20.3                | CH <sub>3</sub> |
| 18  |                                       | 175.0               | C               |
| 19  | 3.69 s                                | 56.1                | CH <sub>3</sub> |

<sup>a</sup> Recorded in DMSO-*d*<sub>6</sub> at 400 MHz for <sup>1</sup>H, 100 MHz for <sup>13</sup>C.

### Detailed structure elucidation of 2D NMR data of compound **1**

The planar structure of **1** was elucidated on the basis of 2D NMR spectra including <sup>1</sup>H-<sup>1</sup>H COSY and HMBC correlations (Fig. 3. in the main article). Two spin systems, H-3/H<sub>2</sub>-4 and H<sub>2</sub>-11/H<sub>2</sub>-12/H-13 were revealed by the <sup>1</sup>H-<sup>1</sup>H COSY spectrum of **1**, as well as HMBC correlations of H<sub>2</sub>-12/C-14 and H<sub>3</sub>-15/C-13, C-14, and C-16 indicated the direct linkages of C-3-C-4 and C-11-C-16 (C-15), respectively. In addition, the HMBC interactions from H<sub>3</sub>-17 to C-2, C-3, and C-11 and from H<sub>2</sub>-4 to C-5 indicated the linkages of C-2/C-11 and C-4/C-5, as well as the location of the methyl group at C-17. An ether bond between C-2 and C-5 was proposed to form the tetrahydrofuran ring A, which is supported by the relative downfield chemical shifts of C-2 ( $\delta_{\text{C}}$  85.2) and C-5 ( $\delta_{\text{C}}$  82.7). The highly functionalized pyran ring B formed from an ether linkage between C-7 and C-9 and the presence of a methyl ester substitution at the C-9 position was similar to the hexanose

sugar unit of trichothosporon A, which was isolated from the fungus *Trichothecium* sp, except that the epoxy group at C-10 ( $\delta_C$  56.1) was replaced by a hydroxy group at C-10 ( $\delta_C$  75.0) in **1**, as further verified by the  $^1\text{H}$ - $^1\text{H}$  COSY correlation of OH-10 ( $\delta_H$  5.35, br s)/H-10. Considering the molecular formula and degrees of unsaturation of **1**, the HMBC correlations of H<sub>2</sub>-4 with C-5, C-6, and C-10, and of H-7 with C-5 revealed that parts A and B joined at C-5, generating the 1,8-dioxaspiro[4.5]decane core. Thus, the planar structure of **1** was determined.

The relative configuration of **1** was deduced on the basis of a NOESY experiment (Fig. 3. in the main article) with a molecular modeling. The NOESY interactions of H-11, H-3, and H-4b indicate that they are co-facial and randomly assigned to be  $\beta$ -oriented, and consequently, Me-17 should adopt an  $\alpha$ -orientation. Moreover, the key NOESY correlation of H-4b/H-10 suggests that the carbon-carbon bond of C-5–C-10 is in the axial position with a  $\beta$ -orientation, while H-10 was  $\alpha$ -oriented. In the chairlike ring B of **1**, H-9 (ax bond) and H-10 (eq bond) showed no recognizable coupling constant ( $\approx 0$  Hz) with each other, indicating that H-9 was also  $\alpha$ -oriented. If H-7 and H-9 were in the axial positions, signals corresponding to H-7/H-9 should exist, which conflicted with the absence of NOESY correlation, suggesting that H-7 should be  $\beta$ -oriented. Thus, the relative configuration of **1** was determined.

**Table S2.** Antiproliferative activity of compounds **1–4** in a panel of human cancer cell lines and WI-38 fibroblast normal cells.

| Comp.                   | Antiproliferative activity (IC <sub>50</sub> , $\mu\text{M}$ ) |      |           |      |         |      |         |      |                  |      |
|-------------------------|----------------------------------------------------------------|------|-----------|------|---------|------|---------|------|------------------|------|
|                         | A-549                                                          |      | SMMC-7721 |      | MCF-7   |      | SW480   |      | WI-38 fibroblast |      |
|                         | Average                                                        | SD   | Average   | SD   | Average | SD   | Average | SD   | Average          | SD   |
| <b>1</b>                | 26.54                                                          | 0.76 | 20.15     | 0.77 | 23.32   | 0.98 | 20.47   | 3.12 | 80.27            | 3.65 |
| <b>2</b>                | 7.37                                                           | 0.40 | 13.32     | 0.26 | 2.25    | 2.03 | 12.68   | 1.39 | 28.95            | 0.70 |
| <b>3</b>                | 9.07                                                           | 2.31 | 19.45     | 1.33 | 4.66    | 0.27 | 7.74    | 1.28 | 20.00            | 1.12 |
| <b>4</b>                | 20.66                                                          | 1.42 | 38.45     | 1.61 | 27.12   | 4.58 | 24.54   | 0.64 | 32.41            | 1.45 |
| Paclitaxel <sup>a</sup> | <0.008                                                         |      | <0.008    |      | <0.008  |      | <0.008  |      | <0.008           |      |

<sup>a</sup>Paclitaxel were used as positive control.

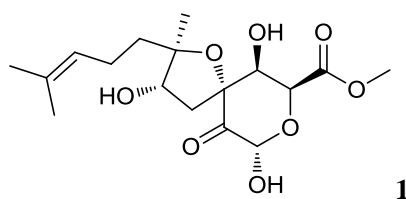

**Table S3.** Important thermodynamic parameters (a.u.) and Boltzmann distributions of the optimized **1**(2*R*,3*S*,5*S*,7*S*,9*S*,10*R*) at LC-wPBE/6-311++G\*\*// B3LYP/6-311++G\*\* level in the MeOH.

| Conformations      | E+ZPE        | G            | Ratio  |
|--------------------|--------------|--------------|--------|
| <b>1a</b> (BAL016) | -1264.795169 | -1264.853011 | 7.96%  |
| <b>1b</b> BAL032   | -1264.795090 | -1264.852916 | 7.11%  |
| <b>1c</b> BAL034   | -1264.795612 | -1264.853482 | 11.14% |
| <b>1d</b> BAL046   | -1264.795931 | -1264.853265 | 5.67%  |
| <b>1e</b> BAL064   | -1264.795020 | -1264.852336 | 1.55%  |
| <b>1f</b> OME048   | -1264.796474 | -1264.855075 | 31.01% |
| <b>1g</b> BAL081   | -1264.793066 | -1264.851739 | 9.58%  |
| <b>1h</b> OME012   | -1264.796197 | -1264.854308 | 12.37% |
| <b>1i</b> OME021   | -1264.794817 | -1264.853207 | 8.28%  |
| <b>1j</b> OME032   | -1264.794168 | -1264.852096 | 2.63%  |
| <b>1k</b> OME039   | -1264.794169 | -1264.852038 | 2.70%  |

E+ZPE, G: total energy (E) in the DMSO at LC-wPBE/6-311++G\*\*//B3LYP/6-311++G\*\* level with IEFPCM solvent continuum model, zero point energy (ZPE) and Gibbs free energy (G) in the MeOH at B3LYP/6-311++G\*\* level with IEFPCM solvent continuum model. %: Boltzmann distributions, using the relative Gibbs free energies as weighting factors

**Table S4.** Optimized coordinate of **1**(2*R*,3*S*,5*S*,7*S*,9*S*,10*R*) at B3LYP/6-311++G\*\*level in the MeOH.

| <b>1a</b> |           |           |           | <b>1b</b> |           |           |           |
|-----------|-----------|-----------|-----------|-----------|-----------|-----------|-----------|
| C         | -1.86846  | -1.965235 | 0.034457  | C         | 1.807879  | -1.964953 | 0.305026  |
| C         | 4.544449  | 0.916458  | -0.592208 | C         | -4.478687 | 1.058671  | -0.858982 |
| C         | 5.508315  | 1.5387    | 0.105831  | C         | -5.386185 | 1.55245   | -0.001082 |
| C         | -3.467903 | 2.007868  | 0.2369    | C         | 3.500267  | 1.94931   | -0.138717 |
| C         | -0.166377 | -1.309204 | -1.796185 | C         | -0.210791 | -1.065413 | 1.644234  |
| C         | -2.749318 | -1.486265 | 1.199904  | C         | 2.914963  | -1.653143 | -0.715285 |
| C         | -2.585525 | 0.783403  | 0.468919  | C         | 2.656416  | 0.696856  | -0.364053 |
| C         | 1.084472  | -1.975531 | -1.195446 | C         | -1.337072 | -1.80627  | 0.902315  |
| C         | -1.806933 | 0.418155  | -0.806148 | C         | 1.631912  | 0.514096  | 0.768001  |
| C         | -0.97875  | -0.868227 | -0.580189 | C         | 0.837398  | -0.797277 | 0.56496   |
| C         | 1.313436  | -1.18962  | 0.134562  | C         | -1.282149 | -1.204559 | -0.536632 |
| C         | 6.196837  | 2.761594  | -0.455236 | C         | -6.065959 | 2.874017  | -0.276027 |
| C         | 6.004743  | 1.115678  | 1.467546  | C         | -5.824841 | 0.883505  | 1.279411  |
| C         | 1.73551   | -2.068409 | 1.306411  | C         | -1.516519 | -2.226825 | -1.642557 |
| C         | -3.388442 | 4.325216  | -0.219667 | C         | 3.381957  | 4.307729  | -0.053199 |
| C         | 3.744529  | -0.302232 | -0.2098   | C         | -3.694856 | -0.22499  | -0.765132 |

|           |           |           |           |           |           |           |           |
|-----------|-----------|-----------|-----------|-----------|-----------|-----------|-----------|
| C         | 2.242206  | 0.024808  | -0.068034 | C         | -2.176913 | 0.044413  | -0.67186  |
| O         | -1.825737 | -3.141579 | -0.283206 | O         | 1.676331  | -3.082792 | 0.773435  |
| O         | -4.677927 | 2.004349  | 0.206627  | O         | 4.678069  | 1.960231  | 0.140009  |
| O         | -3.446714 | -0.302556 | 0.811422  | O         | 3.545668  | -0.420266 | -0.36769  |
| O         | -0.013141 | -0.616272 | 0.47034   | O         | 0.108194  | -0.709051 | -0.684902 |
| O         | -1.980232 | -1.330734 | 2.358794  | O         | 2.398235  | -1.672344 | -2.015644 |
| O         | 0.938969  | -3.378395 | -1.033484 | O         | -1.195134 | -3.218052 | 0.954726  |
| O         | -2.700221 | 0.242814  | -1.896921 | O         | 2.284715  | 0.502844  | 2.029799  |
| O         | -2.695211 | 3.087486  | 0.053895  | O         | 2.731212  | 3.037803  | -0.279604 |
| H         | 4.28148   | 1.336759  | -1.565241 | H         | -4.25477  | 1.654166  | -1.746623 |
| H         | 0.107576  | -0.427343 | -2.382984 | H         | -0.568534 | -0.111347 | 2.042422  |
| H         | -0.711675 | -1.990869 | -2.451568 | H         | 0.175764  | -1.652359 | 2.479448  |
| H         | -3.529493 | -2.220591 | 1.403792  | H         | 3.704025  | -2.403281 | -0.650272 |
| H         | -1.889386 | 1.007529  | 1.284286  | H         | 2.140641  | 0.794636  | -1.325409 |
| H         | 1.950082  | -1.844857 | -1.850202 | H         | -2.310431 | -1.592053 | 1.351336  |
| H         | -1.12335  | 1.228266  | -1.072856 | H         | 0.927609  | 1.349914  | 0.774503  |
| H         | 7.279397  | 2.596348  | -0.54978  | H         | -5.880566 | 3.589846  | 0.537177  |
| H         | 5.806881  | 3.034662  | -1.440971 | H         | -5.721576 | 3.32478   | -1.21228  |
| H         | 6.073883  | 3.625453  | 0.213103  | H         | -7.156632 | 2.751721  | -0.336309 |
| H         | 5.883774  | 1.93349   | 2.19135   | H         | -6.906396 | 0.689706  | 1.262804  |
| H         | 5.491275  | 0.237451  | 1.865646  | H         | -5.318228 | -0.064814 | 1.473207  |
| H         | 7.079911  | 0.891175  | 1.433727  | H         | -5.643695 | 1.543529  | 2.139022  |
| H         | 1.86575   | -1.459022 | 2.207332  | H         | -1.454039 | -1.744392 | -2.624049 |
| H         | 2.680995  | -2.574034 | 1.091256  | H         | -2.504834 | -2.6846   | -1.544775 |
| H         | 0.986182  | -2.838209 | 1.504584  | H         | -0.774963 | -3.027181 | -1.592424 |
| H         | -4.032784 | 4.589583  | 0.621577  | H         | 3.768485  | 4.356591  | 0.967123  |
| H         | -3.988456 | 4.228818  | -1.127079 | H         | 2.609844  | 5.059897  | -0.208037 |
| H         | -2.606377 | 5.071159  | -0.353197 | H         | 4.200011  | 4.443416  | -0.763857 |
| H         | 3.87684   | -1.069278 | -0.987525 | H         | -4.023778 | -0.827189 | 0.088179  |
| H         | 4.11562   | -0.741433 | 0.720217  | H         | -3.894495 | -0.826464 | -1.662532 |
| H         | 1.907283  | 0.57887   | -0.955208 | H         | -1.984547 | 0.711332  | 0.178199  |
| H         | 2.101496  | 0.697752  | 0.78618   | H         | -1.850557 | 0.58585   | -1.568518 |
| H         | -1.097449 | -0.999425 | 2.096329  | H         | 1.486913  | -1.316895 | -1.986833 |
| H         | 0.005184  | -3.557912 | -0.812018 | H         | -0.240596 | -3.423084 | 0.957609  |
| H         | -3.489663 | -0.218185 | -1.560179 | H         | 3.116112  | 0.005595  | 1.927328  |
| <b>1c</b> |           |           |           | <b>1d</b> |           |           |           |
| C         | -2.095895 | -1.79198  | 0.20707   | C         | -2.665475 | -0.728464 | 0.032507  |
| C         | 3.753686  | 1.226489  | -0.16277  | C         | 3.927216  | -1.163689 | 0.407429  |
| C         | 5.045756  | 1.444271  | 0.131821  | C         | 4.551186  | -0.008895 | 0.122726  |
| C         | -2.709659 | 2.450676  | 0.202282  | C         | -0.89119  | 3.178634  | 0.124779  |
| C         | -0.503602 | -1.681031 | -1.823632 | C         | -1.023731 | -1.555425 | -1.781863 |
| C         | -2.712759 | -1.044359 | 1.399942  | C         | -2.934354 | 0.279194  | 1.162669  |
| C         | -2.113387 | 1.068958  | 0.459657  | C         | -1.178756 | 1.703097  | 0.386565  |

|   |           |           |           |   |           |           |           |
|---|-----------|-----------|-----------|---|-----------|-----------|-----------|
| C | 0.633126  | -2.56873  | -1.286232 | C | -0.568709 | -2.87673  | -1.137268 |
| C | -1.579454 | 0.449985  | -0.843283 | C | -0.915366 | 0.857652  | -0.870906 |
| C | -1.049724 | -0.979145 | -0.580337 | C | -1.261453 | -0.622842 | -0.593221 |
| C | 1.191766  | -1.744927 | -0.081883 | C | 0.20826   | -2.402905 | 0.13092   |
| C | 5.842057  | 2.485232  | -0.621075 | C | 6.001052  | -0.001587 | -0.304411 |
| C | 5.826411  | 0.716909  | 1.200051  | C | 3.918317  | 1.360481  | 0.194265  |
| C | 1.605156  | -2.605063 | 1.106186  | C | 0.037821  | -3.32357  | 1.332886  |
| C | -2.146436 | 4.654247  | -0.437124 | C | 0.85855   | 4.700155  | -0.336052 |
| C | 2.797124  | 0.242055  | 0.458652  | C | 2.500197  | -1.376647 | 0.841181  |
| C | 2.316684  | -0.806373 | -0.565405 | C | 1.688132  | -2.143874 | -0.222633 |
| O | -2.361367 | -2.961306 | -0.012318 | O | -3.475717 | -1.593954 | -0.24991  |
| O | -3.885727 | 2.729704  | 0.26623   | O | -1.72252  | 4.055753  | 0.058559  |
| O | -3.159196 | 0.241934  | 0.970205  | O | -2.559321 | 1.588851  | 0.73402   |
| O | 0.056365  | -0.901812 | 0.355201  | O | -0.410677 | -1.105418 | 0.478147  |
| O | -1.808776 | -0.997379 | 2.466953  | O | -2.294731 | -0.130455 | 2.338095  |
| O | 0.197213  | -3.878581 | -0.956655 | O | -1.652039 | -3.75487  | -0.871164 |
| O | -2.598533 | 0.422151  | -1.832784 | O | -1.677749 | 1.347179  | -1.964909 |
| O | -1.731189 | 3.306312  | -0.124106 | O | 0.428138  | 3.353061  | -0.03967  |
| H | 3.318702  | 1.824919  | -0.966494 | H | 4.508409  | -2.082767 | 0.305719  |
| H | -0.118425 | -0.931759 | -2.521148 | H | -0.23889  | -1.139015 | -2.419504 |
| H | -1.259894 | -2.26769  | -2.348388 | H | -1.914866 | -1.693484 | -2.39699  |
| H | -3.613517 | -1.558776 | 1.736913  | H | -4.005139 | 0.342039  | 1.360144  |
| H | -1.30098  | 1.171277  | 1.187051  | H | -0.53697  | 1.366021  | 1.207262  |
| H | 1.423158  | -2.698692 | -2.031308 | H | 0.11006   | -3.429768 | -1.792999 |
| H | -0.760972 | 1.057149  | -1.238609 | H | 0.138314  | 0.921427  | -1.155011 |
| H | 6.712665  | 2.03389   | -1.117693 | H | 6.612614  | 0.599157  | 0.383657  |
| H | 5.238977  | 2.98944   | -1.382933 | H | 6.422534  | -1.011318 | -0.340696 |
| H | 6.238995  | 3.249785  | 0.061719  | H | 6.118112  | 0.453512  | -1.298063 |
| H | 6.213929  | 1.425184  | 1.945619  | H | 4.005474  | 1.872875  | -0.773953 |
| H | 5.240906  | -0.038851 | 1.72864   | H | 2.860908  | 1.342196  | 0.468247  |
| H | 6.703569  | 0.219136  | 0.763762  | H | 4.444845  | 1.991699  | 0.923888  |
| H | 2.467663  | -3.225029 | 0.840329  | H | 0.510899  | -2.895537 | 2.221383  |
| H | 0.791059  | -3.269182 | 1.403464  | H | 0.502065  | -4.294463 | 1.130651  |
| H | 1.881074  | -1.980208 | 1.960452  | H | -1.020453 | -3.490944 | 1.542736  |
| H | -2.831861 | 4.649998  | -1.287385 | H | 0.393667  | 5.0497    | -1.260352 |
| H | -1.2305   | 5.188925  | -0.684188 | H | 1.939955  | 4.639796  | -0.448136 |
| H | -2.635451 | 5.107498  | 0.427874  | H | 0.593119  | 5.368752  | 0.485691  |
| H | 3.249835  | -0.257599 | 1.319905  | H | 2.499505  | -1.949068 | 1.779209  |
| H | 1.918078  | 0.783199  | 0.834937  | H | 2.000595  | -0.427983 | 1.054691  |
| H | 3.166423  | -1.429856 | -0.871854 | H | 2.159496  | -3.11664  | -0.415946 |
| H | 1.975734  | -0.285934 | -1.470323 | H | 1.739669  | -1.585376 | -1.166091 |
| H | -0.90577  | -0.912987 | 2.099354  | H | -1.448576 | -0.556805 | 2.093679  |
| H | -0.72581  | -3.818336 | -0.644267 | H | -2.437991 | -3.211342 | -0.671862 |

|           |           |           |           |           |           |           |           |
|-----------|-----------|-----------|-----------|-----------|-----------|-----------|-----------|
| H         | -3.433009 | 0.183031  | -1.390779 | H         | -2.550608 | 1.608639  | -1.620138 |
| <b>1e</b> |           |           |           | <b>1f</b> |           |           |           |
| C         | -1.908126 | -1.862627 | 0.035631  | C         | -1.89737  | -1.890774 | 0.273313  |
| C         | 4.111536  | 0.837947  | 0.401838  | C         | 3.745052  | 1.48797   | -0.330608 |
| C         | 4.129039  | 2.143448  | 0.086682  | C         | 4.999482  | 1.849434  | -0.015294 |
| C         | -2.023994 | 2.448125  | 0.103796  | C         | -2.885276 | 2.210918  | -0.24168  |
| C         | -0.062759 | -1.849647 | -1.772101 | C         | -0.238413 | -1.912275 | -1.706663 |
| C         | -2.620029 | -1.083665 | 1.154929  | C         | -2.571584 | -1.068096 | 1.384065  |
| C         | -1.705623 | 0.982609  | 0.375555  | C         | -2.124081 | 0.953444  | 0.181847  |
| C         | 0.954856  | -2.80167  | -1.11864  | C         | 0.937     | -2.640045 | -1.032476 |
| C         | -1.08282  | 0.346531  | -0.877758 | C         | -1.521921 | 0.213437  | -1.026892 |
| C         | -0.709115 | -1.124581 | -0.590434 | C         | -0.875565 | -1.107207 | -0.57337  |
| C         | 1.417268  | -2.012027 | 0.145776  | C         | 1.397159  | -1.630558 | 0.067551  |
| C         | 5.41622   | 2.81826   | -0.328661 | C         | 5.755042  | 2.83991   | -0.871099 |
| C         | 2.928684  | 3.059646  | 0.109379  | C         | 5.774769  | 1.340911  | 1.176406  |
| C         | 1.699173  | -2.898697 | 1.352334  | C         | 1.82746   | -2.299777 | 1.367586  |
| C         | -3.676843 | 4.092806  | -0.216428 | C         | -3.642266 | 4.337176  | 0.450179  |
| C         | 2.940796  | -0.006877 | 0.832608  | C         | 2.833329  | 0.524379  | 0.384059  |
| C         | 2.601593  | -1.089519 | -0.212736 | C         | 2.471115  | -0.682702 | -0.504472 |
| O         | -2.220685 | -3.009007 | -0.235203 | O         | -2.092006 | -3.089922 | 0.172919  |
| O         | -1.136662 | 3.258066  | -0.081194 | O         | -3.423699 | 2.349599  | -1.329332 |
| O         | -2.885637 | 0.251154  | 0.716911  | O         | -3.097955 | 0.140884  | 0.849958  |
| O         | 0.260934  | -1.157023 | 0.488173  | O         | 0.192761  | -0.822179 | 0.361405  |
| O         | -1.872954 | -1.146294 | 2.336475  | O         | -1.671273 | -0.869268 | 2.43973   |
| O         | 0.405464  | -4.081993 | -0.846311 | O         | 0.577472  | -3.924091 | -0.544471 |
| O         | -1.985274 | 0.423512  | -1.972136 | O         | -2.51121  | -0.159347 | -1.968387 |
| O         | -3.328029 | 2.717969  | 0.065619  | O         | -2.902575 | 3.122391  | 0.724182  |
| H         | 5.056905  | 0.295323  | 0.332939  | H         | 3.309272  | 1.93299   | -1.228013 |
| H         | 0.437661  | -1.121513 | -2.416766 | H         | 0.117627  | -1.225623 | -2.48021  |
| H         | -0.78641  | -2.393281 | -2.382486 | H         | -0.93328  | -2.612377 | -2.173678 |
| H         | -3.601682 | -1.518351 | 1.347021  | H         | -3.436168 | -1.607514 | 1.7733    |
| H         | -0.985511 | 0.966883  | 1.200005  | H         | -1.326878 | 1.246007  | 0.873861  |
| H         | 1.815162  | -2.977664 | -1.770885 | H         | 1.758492  | -2.808617 | -1.734799 |
| H         | -0.179066 | 0.891414  | -1.162927 | H         | -0.741514 | 0.848901  | -1.473857 |
| H         | 5.662498  | 3.649097  | 0.347687  | H         | 6.051634  | 3.722054  | -0.28611  |
| H         | 6.261106  | 2.122121  | -0.333559 | H         | 6.685308  | 2.399488  | -1.256931 |
| H         | 5.326912  | 3.255079  | -1.333339 | H         | 5.160677  | 3.182155  | -1.724432 |
| H         | 2.789117  | 3.530624  | -0.873519 | H         | 6.712343  | 0.868804  | 0.851573  |
| H         | 1.994744  | 2.558085  | 0.373079  | H         | 6.061317  | 2.172804  | 1.834915  |
| H         | 3.083229  | 3.881003  | 0.823272  | H         | 5.223657  | 0.613273  | 1.776495  |
| H         | 1.911934  | -2.293811 | 2.238505  | H         | 2.036883  | -1.552815 | 2.138803  |
| H         | 2.567612  | -3.535666 | 1.154738  | H         | 2.73602   | -2.888885 | 1.204933  |
| H         | 0.845293  | -3.545765 | 1.563036  | H         | 1.048919  | -2.973513 | 1.731459  |



|           |           |           |           |           |           |           |           |
|-----------|-----------|-----------|-----------|-----------|-----------|-----------|-----------|
| H         | -3.260014 | 4.751526  | 0.548218  | H         | -3.549451 | 4.938445  | 1.352796  |
| H         | -4.765185 | 4.122547  | -0.199068 | H         | -4.688307 | 4.099717  | 0.247232  |
| H         | -3.29761  | 4.382544  | -1.198664 | H         | -3.205588 | 4.853694  | -0.406776 |
| H         | 3.188709  | -0.490761 | 1.787775  | H         | 3.281943  | 0.178675  | 1.31984   |
| H         | 2.052095  | 0.603461  | 1.013735  | H         | 1.902761  | 1.042204  | 0.65426   |
| H         | 3.47977   | -1.726339 | -0.383289 | H         | 3.374203  | -1.275283 | -0.699056 |
| H         | 2.392768  | -0.592692 | -1.168873 | H         | 2.128411  | -0.313231 | -1.480191 |
| H         | -0.923717 | -1.145843 | 2.099427  | H         | -0.780392 | -0.735909 | 2.056133  |
| H         | -0.543168 | -3.966554 | -0.64737  | H         | -0.362567 | -3.893871 | -0.28288  |
| H         | -2.879543 | 0.24709   | -1.627981 | H         | -3.04104  | 0.647017  | -2.131414 |
| <b>1g</b> |           |           |           | <b>1h</b> |           |           |           |
| C         | -1.886924 | -2.020869 | 0.563857  | C         | 1.847187  | -1.907053 | -0.107249 |
| C         | 4.483944  | 1.200268  | -0.388252 | C         | -4.212516 | 0.889009  | -0.343122 |
| C         | 5.583172  | 1.458512  | 0.338677  | C         | -4.285267 | 2.189882  | -0.017482 |
| C         | -3.543426 | 1.892779  | 0.160911  | C         | 2.500762  | 2.277233  | 0.266243  |
| C         | -0.505995 | -1.812752 | -1.613163 | C         | 0.013897  | -1.948941 | 1.713094  |
| C         | -2.495156 | -1.275663 | 1.765892  | C         | 2.563147  | -1.093098 | -1.198092 |
| C         | -2.580934 | 0.755837  | 0.494203  | C         | 1.869952  | 0.947955  | -0.153815 |
| C         | 0.94868   | -1.307025 | -1.634926 | C         | -1.03031  | -2.806265 | 0.978473  |
| C         | -2.060199 | 0.083626  | -0.789569 | C         | 1.203461  | 0.227588  | 1.031923  |
| C         | -1.128248 | -1.100491 | -0.414627 | C         | 0.699403  | -1.159678 | 0.598096  |
| C         | 1.268365  | -1.016419 | -0.148211 | C         | -1.449503 | -1.902525 | -0.226706 |
| C         | 6.259794  | 2.807719  | 0.259101  | C         | -5.590211 | 2.79756   | 0.443197  |
| C         | 6.252011  | 0.482268  | 1.276371  | C         | -3.131883 | 3.162676  | -0.072216 |
| C         | 1.684635  | -2.268858 | 0.626191  | C         | -1.675404 | -2.678074 | -1.519491 |
| C         | -3.653637 | 4.033715  | -0.833906 | C         | 3.308987  | 4.357413  | -0.502745 |
| C         | 3.669818  | -0.066214 | -0.449713 | C         | -3.017892 | 0.101637  | -0.815708 |
| C         | 2.230659  | 0.16206   | 0.060883  | C         | -2.656048 | -1.028059 | 0.170176  |
| O         | -2.010146 | -3.220073 | 0.423163  | O         | 2.114646  | -3.081798 | 0.078617  |
| O         | -4.735683 | 1.888638  | 0.370568  | O         | 2.824502  | 2.550906  | 1.411596  |
| O         | -3.306708 | -0.206202 | 1.260147  | O         | 2.953852  | 0.175474  | -0.686415 |
| O         | -0.024193 | -0.543889 | 0.3578    | O         | -0.293472 | -1.002871 | -0.443583 |
| O         | -1.515594 | -0.856594 | 2.667811  | O         | 1.753566  | -1.011808 | -2.339264 |
| O         | 1.87427   | -2.24315  | -2.166781 | O         | -0.533481 | -4.08571  | 0.61555   |
| O         | -3.146637 | -0.360375 | -1.588417 | O         | 2.116873  | -0.017584 | 2.085528  |
| O         | -2.867567 | 2.894967  | -0.419432 | O         | 2.666628  | 3.087853  | -0.772859 |
| H         | 4.105087  | 2.005387  | -1.021755 | H         | -5.12864  | 0.301063  | -0.252927 |
| H         | -1.049215 | -1.596532 | -2.536043 | H         | -0.470386 | -1.249373 | 2.400284  |
| H         | -0.515851 | -2.89523  | -1.458068 | H         | 0.708071  | -2.56141  | 2.291065  |
| H         | -3.192883 | -1.927866 | 2.292658  | H         | 3.494938  | -1.586366 | -1.478204 |
| H         | -1.743609 | 1.166453  | 1.067917  | H         | 1.124888  | 1.150983  | -0.931691 |
| H         | 1.006428  | -0.360998 | -2.190956 | H         | -1.905029 | -2.995066 | 1.607359  |
| H         | -1.492319 | 0.801456  | -1.387304 | H         | 0.338703  | 0.822827  | 1.363702  |

|           |           |           |           |           |           |           |           |
|-----------|-----------|-----------|-----------|-----------|-----------|-----------|-----------|
| H         | 6.295481  | 3.290123  | 1.246097  | H         | -5.490207 | 3.233245  | 1.447374  |
| H         | 7.30287   | 2.707784  | -0.073071 | H         | -5.899552 | 3.618411  | -0.219303 |
| H         | 5.745913  | 3.483393  | -0.432171 | H         | -6.398655 | 2.0599    | 0.470819  |
| H         | 7.284797  | 0.284632  | 0.956785  | H         | -3.355567 | 3.989333  | -0.760976 |
| H         | 6.318691  | 0.905908  | 2.287979  | H         | -2.966966 | 3.619678  | 0.913359  |
| H         | 5.734274  | -0.476996 | 1.348378  | H         | -2.192549 | 2.705701  | -0.391958 |
| H         | 2.632417  | -2.662588 | 0.251217  | H         | -1.855847 | -1.995927 | -2.355288 |
| H         | 0.935435  | -3.061373 | 0.537288  | H         | -2.546115 | -3.334202 | -1.418273 |
| H         | 1.803089  | -2.023788 | 1.687111  | H         | -0.809717 | -3.301053 | -1.754112 |
| H         | -4.40338  | 3.727905  | -1.566896 | H         | 3.367354  | 4.859569  | -1.466767 |
| H         | -2.943302 | 4.72928   | -1.278425 | H         | 4.305979  | 4.191266  | -0.090208 |
| H         | -4.146104 | 4.48593   | 0.029645  | H         | 2.70813   | 4.937055  | 0.200769  |
| H         | 3.624587  | -0.418071 | -1.489244 | H         | -3.252378 | -0.336736 | -1.79604  |
| H         | 4.143075  | -0.868736 | 0.123682  | H         | -2.144195 | 0.742674  | -0.961276 |
| H         | 1.798796  | 1.036175  | -0.443326 | H         | -3.520154 | -1.693979 | 0.29644   |
| H         | 2.260835  | 0.400356  | 1.131744  | H         | -2.463204 | -0.582759 | 1.154852  |
| H         | -0.720867 | -0.607238 | 2.152144  | H         | 0.824172  | -0.923094 | -2.044198 |
| H         | 1.73787   | -2.27843  | -3.12692  | H         | 0.42205   | -3.997045 | 0.43592   |
| H         | -3.82341  | -0.724484 | -0.989651 | H         | 2.533404  | 0.846048  | 2.278477  |
| <b>ii</b> |           |           |           | <b>lj</b> |           |           |           |
| C         | -1.874043 | -1.893559 | 0.21428   | C         | 1.807879  | -1.964953 | 0.305026  |
| C         | 3.723886  | 1.534834  | -0.198283 | C         | -4.478687 | 1.058671  | -0.858982 |
| C         | 4.991281  | 1.876989  | 0.084776  | C         | -5.386185 | 1.55245   | -0.001082 |
| C         | -2.624988 | 2.344198  | 0.085675  | C         | 3.500267  | 1.94931   | -0.138717 |
| C         | -0.254208 | -1.738783 | -1.792067 | C         | -0.210791 | -1.065413 | 1.644234  |
| C         | -2.554354 | -1.155154 | 1.377944  | C         | 2.914963  | -1.653143 | -0.715285 |
| C         | -2.04856  | 0.968209  | 0.403128  | C         | 2.656416  | 0.696856  | -0.364053 |
| C         | 0.931494  | -2.535337 | -1.219857 | C         | -1.337072 | -1.80627  | 0.902315  |
| C         | -1.459449 | 0.350702  | -0.87653  | C         | 1.631912  | 0.514096  | 0.768001  |
| C         | -0.858789 | -1.041003 | -0.572938 | C         | 0.837398  | -0.797277 | 0.56496   |
| C         | 1.423932  | -1.640098 | -0.038448 | C         | -1.282149 | -1.204559 | -0.536632 |
| C         | 5.68636   | 2.970182  | -0.69383  | C         | -6.065959 | 2.874017  | -0.276027 |
| C         | 5.839217  | 1.248426  | 1.164429  | C         | -5.824841 | 0.883505  | 1.279411  |
| C         | 1.910701  | -2.430758 | 1.169854  | C         | -1.516519 | -2.226825 | -1.642557 |
| C         | -4.549446 | 3.676812  | -0.158055 | C         | 3.381957  | 4.307729  | -0.053199 |
| C         | 2.862557  | 0.482571  | 0.450405  | C         | -3.694856 | -0.22499  | -0.765132 |
| C         | 2.465485  | -0.622736 | -0.549152 | C         | -2.176913 | 0.044413  | -0.67186  |
| O         | -2.067861 | -3.080712 | 0.017767  | O         | 1.676331  | -3.082792 | 0.773435  |
| O         | -1.904848 | 3.269449  | -0.232726 | O         | 4.678069  | 1.960231  | 0.140009  |
| O         | -3.061286 | 0.09636   | 0.910046  | O         | 3.545668  | -0.420266 | -0.36769  |
| O         | 0.221826  | -0.886811 | 0.382484  | O         | 0.108194  | -0.709051 | -0.684902 |
| O         | -1.675136 | -1.034971 | 2.459464  | O         | 2.398235  | -1.672344 | -2.015644 |
| O         | 0.573695  | -3.858171 | -0.84964  | O         | -1.195134 | -3.218052 | 0.954726  |

|           |           |           |           |   |           |           |           |
|-----------|-----------|-----------|-----------|---|-----------|-----------|-----------|
| O         | -2.459983 | 0.247064  | -1.879957 | O | 2.284715  | 0.502844  | 2.029799  |
| O         | -3.954445 | 2.399072  | 0.164246  | O | 2.731212  | 3.037803  | -0.279604 |
| H         | 3.232969  | 2.073377  | -1.012043 | H | -4.25477  | 1.654166  | -1.746623 |
| H         | 0.087271  | -0.986245 | -2.508598 | H | -0.568534 | -0.111347 | 2.042422  |
| H         | -0.96582  | -2.38826  | -2.30526  | H | 0.175764  | -1.652359 | 2.479448  |
| H         | -3.432995 | -1.70965  | 1.709785  | H | 3.704025  | -2.403281 | -0.650272 |
| H         | -1.257728 | 1.120123  | 1.14524   | H | 2.140641  | 0.794636  | -1.325409 |
| H         | 1.735183  | -2.638948 | -1.954393 | H | -2.310431 | -1.592053 | 1.351336  |
| H         | -0.670113 | 0.996453  | -1.270397 | H | 0.927609  | 1.349914  | 0.774503  |
| H         | 6.01311   | 3.782234  | -0.028949 | H | -5.880566 | 3.589846  | 0.537177  |
| H         | 6.593464  | 2.589846  | -1.184527 | H | -5.721576 | 3.32478   | -1.21228  |
| H         | 5.037867  | 3.400834  | -1.46354  | H | -7.156632 | 2.751721  | -0.336309 |
| H         | 6.761021  | 0.8317    | 0.735388  | H | -6.906396 | 0.689706  | 1.262804  |
| H         | 6.155233  | 2.004483  | 1.896715  | H | -5.318228 | -0.064814 | 1.473207  |
| H         | 5.331306  | 0.448079  | 1.707642  | H | -5.643695 | 1.543529  | 2.139022  |
| H         | 2.119895  | -1.762958 | 2.010523  | H | -1.454039 | -1.744392 | -2.624049 |
| H         | 2.831642  | -2.968686 | 0.921523  | H | -2.504834 | -2.6846   | -1.544775 |
| H         | 1.162987  | -3.163924 | 1.478692  | H | -0.774963 | -3.027181 | -1.592424 |
| H         | -5.621861 | 3.534014  | -0.034371 | H | 3.768485  | 4.356591  | 0.967123  |
| H         | -4.312314 | 3.952807  | -1.187727 | H | 2.609844  | 5.059897  | -0.208037 |
| H         | -4.181181 | 4.446408  | 0.523464  | H | 4.200011  | 4.443416  | -0.763857 |
| H         | 3.364434  | 0.040589  | 1.316079  | H | -4.023778 | -0.827189 | 0.088179  |
| H         | 1.943107  | 0.952425  | 0.826027  | H | -3.894495 | -0.826464 | -1.662532 |
| H         | 3.362042  | -1.180401 | -0.848873 | H | -1.984547 | 0.711332  | 0.178199  |
| H         | 2.077624  | -0.151226 | -1.462007 | H | -1.850557 | 0.58585   | -1.568518 |
| H         | -0.769567 | -0.919971 | 2.106853  | H | 1.486913  | -1.316895 | -1.986833 |
| H         | -0.356314 | -3.846504 | -0.553009 | H | -0.240596 | -3.423084 | 0.957609  |
| H         | -3.283408 | -0.039813 | -1.445706 | H | 3.116112  | 0.005595  | 1.927328  |
| <b>1k</b> |           |           |           |   |           |           |           |
| C         | -1.751096 | -1.931321 | 0.043314  | O | -4.606203 | 1.903792  | 0.172671  |
| C         | 4.617843  | 1.043988  | -0.603248 | H | 4.338038  | 1.454112  | -1.575943 |
| C         | 5.579457  | 1.685295  | 0.080449  | H | 0.23171   | -0.417648 | -2.382585 |
| C         | -3.28669  | 2.090999  | 0.176869  | H | -0.567786 | -1.991971 | -2.424606 |
| C         | -0.035393 | -1.290519 | -1.779517 | H | -3.427525 | -2.179242 | 1.395811  |
| C         | -2.649127 | -1.443079 | 1.19193   | H | -1.794709 | 1.042988  | 1.253588  |
| C         | -2.486192 | 0.818355  | 0.434609  | H | 2.087363  | -1.804505 | -1.808529 |
| C         | 1.218655  | -1.930399 | -1.156942 | H | -1.022621 | 1.253937  | -1.103912 |
| C         | -1.697856 | 0.439173  | -0.829896 | H | 6.113913  | 3.781108  | 0.169196  |
| C         | -0.862149 | -0.836541 | -0.577635 | H | 7.326655  | 2.766042  | -0.601005 |
| C         | 1.429397  | -1.115386 | 0.157501  | H | 5.837772  | 3.176272  | -1.478287 |
| C         | 6.242785  | 2.915223  | -0.495378 | H | 7.175408  | 1.06773   | 1.393443  |
| C         | 6.097782  | 1.278073  | 1.438834  | H | 5.974546  | 2.099028  | 2.158673  |
| C         | 1.867893  | -1.962249 | 1.346629  | H | 5.601229  | 0.395656  | 1.848999  |

|   |           |           |           |   |           |           |           |
|---|-----------|-----------|-----------|---|-----------|-----------|-----------|
| C | -5.405355 | 3.079496  | -0.091965 | H | 1.985706  | -1.3329   | 2.235441  |
| C | 3.842063  | -0.18538  | -0.205677 | H | 2.823322  | -2.45315  | 1.141386  |
| C | 2.333731  | 0.113845  | -0.066501 | H | 1.133841  | -2.742583 | 1.559441  |
| O | -1.695532 | -3.111652 | -0.25681  | H | -6.439064 | 2.7396    | -0.051226 |
| O | -2.730754 | 3.152358  | -0.024723 | H | -5.168754 | 3.480415  | -1.079827 |
| O | -3.349388 | -0.267294 | 0.78006   | H | -5.218828 | 3.840761  | 0.668381  |
| O | 0.090267  | -0.564925 | 0.480385  | H | 3.988758  | -0.95887  | -0.974435 |
| O | -1.895004 | -1.267353 | 2.357492  | H | 4.222501  | -0.606276 | 0.729017  |
| O | 1.085742  | -3.331149 | -0.96626  | H | 1.986833  | 0.646795  | -0.961794 |
| O | -2.584074 | 0.238373  | -1.922089 | H | 2.180587  | 0.797327  | 0.777118  |

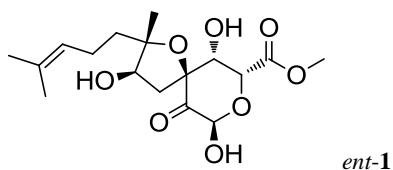

**Table S5.** Important thermodynamic parameters (a.u.) and Boltzmann distributions of the optimized *ent-1* (2*S*,3*R*,5*R*,7*R*,9*R*,10*S*) at B3LYP/6-311++G\*\* level in the MeOH.

| Conformations           | E+ZPE        | G            | Ratio  |
|-------------------------|--------------|--------------|--------|
| <i>ent-1 a</i> (BAL000) | -1264.795089 | -1264.852916 | 6.92%  |
| <i>ent-1 b</i> BAL017   | -1264.795931 | -1264.853266 | 5.51%  |
| <i>ent-1 c</i> BAL027   | -1264.794078 | -1264.851821 | 8.07%  |
| <i>ent-1 d</i> BAL054   | -1264.794170 | -1264.852044 | 2.64%  |
| <i>ent-1 e</i> OME032   | -1264.793097 | -1264.851992 | 10.27% |
| <i>ent-1 f</i> BAL067   | -1264.795828 | -1264.854552 | 18.74% |
| <i>ent-1 g</i> BAL074   | -1264.793064 | -1264.851726 | 9.19%  |
| <i>ent-1 h</i> OME001   | -1264.793577 | -1264.852116 | 8.57%  |
| <i>ent-1 i</i> BAL095   | -1264.793557 | -1264.851615 | 4.95%  |
| <i>ent-1 j</i> OME031   | -1264.796311 | -1264.855021 | 25.13% |

E+ZPE, G: total energy (E) in the DMSO at LC-wPBE/6-311++G\*\*//B3LYP/6-311++G\*\* level with IEFPCM solvent continuum model, zero point energy (ZPE) and Gibbs free energy (G) in the MeOH at B3LYP/6-311++G\*\* level with IEFPCM solvent continuum model. %: Boltzmann distributions, using the relative Gibbs free energies as weighting factors

**Table S6.** Optimized coordinate of *ent-1*(2*S*,3*R*,5*R*,7*R*,9*R*,10*S*) at B3LYP/6-311++G\*\* level in the MeOH.

| <i>ent-1 a</i> |           |           |           | <i>ent-1 b</i> |           |           |          |
|----------------|-----------|-----------|-----------|----------------|-----------|-----------|----------|
| C              | -1.807892 | -1.964944 | 0.305142  | C              | 2.665486  | -0.728421 | 0.03249  |
| C              | 4.478516  | 1.058616  | -0.859122 | C              | -3.927191 | -1.163738 | 0.407456 |
| C              | 5.385801  | 1.55253   | -0.001072 | C              | -4.551164 | -0.008954 | 0.122719 |
| C              | -3.500036 | 1.949443  | -0.138793 | C              | 0.891131  | 3.178644  | 0.124785 |
| C              | 0.210898  | -1.065482 | 1.644217  | C              | 1.023739  | -1.555413 | -1.78186 |
| C              | -2.915107 | -1.653087 | -0.715011 | C              | 2.934357  | 0.27924   | 1.162652 |

|   |           |           |           |   |           |           |           |
|---|-----------|-----------|-----------|---|-----------|-----------|-----------|
| C | -2.656313 | 0.696885  | -0.364012 | C | 1.178729  | 1.703112  | 0.386564  |
| C | 1.337126  | -1.806381 | 0.902244  | C | 0.568744  | -2.876726 | -1.137262 |
| C | -1.631723 | 0.514127  | 0.767965  | C | 0.915339  | 0.857661  | -0.870903 |
| C | -0.837342 | -0.797325 | 0.564979  | C | 1.261457  | -0.622825 | -0.593223 |
| C | 1.282115  | -1.204739 | -0.5367   | C | -0.208223 | -2.402911 | 0.130931  |
| C | 6.065565  | 2.874102  | -0.275991 | C | -6.001033 | -0.001661 | -0.30441  |
| C | 5.82427   | 0.883688  | 1.279537  | C | -3.918296 | 1.360425  | 0.19421   |
| C | 1.516623  | -2.22703  | -1.64258  | C | -0.037769 | -3.323577 | 1.332894  |
| C | -3.381411 | 4.307852  | -0.053274 | C | -0.858643 | 4.700132  | -0.336024 |
| C | 3.694726  | -0.225061 | -0.765265 | C | -2.500168 | -1.37668  | 0.841202  |
| C | 2.176765  | 0.044293  | -0.671989 | C | -1.688099 | -2.143896 | -0.222616 |
| O | -1.676322 | -3.082834 | 0.773455  | O | 3.475744  | -1.593893 | -0.249939 |
| O | -4.677874 | 1.960549  | 0.139741  | O | 1.722442  | 4.055781  | 0.058567  |
| O | -3.545678 | -0.420151 | -0.367475 | O | 2.559299  | 1.58889   | 0.734005  |
| O | -0.108259 | -0.709357 | -0.684961 | O | 0.410703  | -1.10542  | 0.478157  |
| O | -2.398562 | -1.672395 | -2.01547  | O | 2.294747  | -0.130416 | 2.338083  |
| O | 1.195176  | -3.218171 | 0.95472   | O | 1.652089  | -3.754847 | -0.87116  |
| O | -2.284406 | 0.503054  | 2.029826  | O | 1.677701  | 1.347202  | -1.964916 |
| O | -2.73079  | 3.037838  | -0.279525 | O | -0.428201 | 3.353044  | -0.039655 |
| H | 4.254762  | 1.654005  | -1.746875 | H | -4.508383 | -2.082819 | 0.305779  |
| H | -0.175662 | -1.652484 | 2.479395  | H | 1.91487   | -1.693456 | -2.396996 |
| H | 0.568649  | -0.111449 | 2.042468  | H | 0.238886  | -1.139017 | -2.419496 |
| H | -3.704205 | -2.403176 | -0.649831 | H | 4.005143  | 0.342102  | 1.360117  |
| H | -2.140601 | 0.794526  | -1.325423 | H | 0.536959  | 1.366024  | 1.20727   |
| H | 2.310534  | -1.592163 | 1.351169  | H | -0.11002  | -3.429775 | -1.792989 |
| H | -0.927345 | 1.349889  | 0.774319  | H | -0.138345 | 0.921419  | -1.154996 |
| H | 7.156276  | 2.751908  | -0.335757 | H | -6.118102 | 0.453429  | -1.298064 |
| H | 5.721549  | 3.324631  | -1.212492 | H | -6.422505 | -1.011397 | -0.340686 |
| H | 5.87973   | 3.590079  | 0.536982  | H | -6.612597 | 0.599081  | 0.383658  |
| H | 5.643697  | 1.544067  | 2.138992  | H | -4.444846 | 1.991679  | 0.923785  |
| H | 5.317104  | -0.064261 | 1.473701  | H | -2.860896 | 1.342153  | 0.468227  |
| H | 6.905704  | 0.689206  | 1.262789  | H | -4.00542  | 1.872771  | -0.774036 |
| H | 2.504936  | -2.68478  | -1.544652 | H | -0.502013 | -4.294471 | 1.130664  |
| H | 1.454229  | -1.744644 | -2.6241   | H | -0.51084  | -2.895545 | 2.221396  |
| H | 0.775079  | -3.027405 | -1.592505 | H | 1.020507  | -3.490947 | 1.542734  |
| H | -3.767889 | 4.356904  | 0.96706   | H | -1.940047 | 4.639752  | -0.448102 |
| H | -4.199482 | 4.443518  | -0.763915 | H | -0.393772 | 5.049694  | -1.260324 |
| H | -2.609224 | 5.059916  | -0.208248 | H | -0.593221 | 5.368728  | 0.485722  |
| H | 3.894343  | -0.826524 | -1.662676 | H | -2.000576 | -0.428011 | 1.054712  |
| H | 4.023677  | -0.827268 | 0.088032  | H | -2.499465 | -1.949103 | 1.779229  |
| H | 1.850377  | 0.585644  | -1.568686 | H | -1.739647 | -1.585398 | -1.166074 |
| H | 1.984358  | 0.711242  | 0.178042  | H | -2.159453 | -3.116667 | -0.415928 |
| H | -1.487148 | -1.317193 | -1.986779 | H | 1.448607  | -0.556799 | 2.093671  |

|                |           |           |           |                |           |           |           |
|----------------|-----------|-----------|-----------|----------------|-----------|-----------|-----------|
| H              | 0.240632  | -3.423212 | 0.957371  | H              | 2.438036  | -3.211305 | -0.671875 |
| H              | -3.115838 | 0.005837  | 1.927491  | H              | 2.550563  | 1.608666  | -1.620156 |
| <b>ent-1 c</b> |           |           |           | <b>ent-1 d</b> |           |           |           |
| C              | 1.857665  | -1.955135 | 0.011377  | C              | 1.750751  | -1.931181 | 0.043206  |
| C              | -4.559963 | 0.94485   | -0.580016 | C              | -4.618213 | 1.043606  | -0.603062 |
| C              | -5.523879 | 1.555758  | 0.127877  | C              | -5.5799   | 1.68509   | 0.080358  |
| C              | 3.529949  | 1.959611  | 0.275112  | C              | 3.287325  | 2.090702  | 0.177198  |
| C              | 0.156205  | -1.25857  | -1.804269 | C              | 0.035283  | -1.289776 | -1.779656 |
| C              | 2.710977  | -1.513571 | 1.211167  | C              | 2.648921  | -1.443248 | 1.191853  |
| C              | 2.606586  | 0.761809  | 0.496247  | C              | 2.486502  | 0.818241  | 0.434835  |
| C              | -1.094986 | -1.937573 | -1.218906 | C              | -1.218801 | -1.929733 | -1.157203 |
| C              | 1.816116  | 0.430148  | -0.778112 | C              | 1.698082  | 0.4394    | -0.829719 |
| C              | 0.967645  | -0.844871 | -0.576483 | C              | 0.862106  | -0.836181 | -0.577705 |
| C              | -1.328687 | -1.170072 | 0.121236  | C              | -1.429385 | -1.115084 | 0.157553  |
| C              | -6.209184 | 2.790211  | -0.411483 | C              | -6.243425 | 2.914665  | -0.495994 |
| C              | -6.023082 | 1.108547  | 1.480799  | C              | -6.098118 | 1.278391  | 1.438928  |
| C              | -1.751044 | -2.067373 | 1.278924  | C              | -1.867601 | -1.962351 | 1.346506  |
| C              | 3.534371  | 4.255923  | -0.283139 | C              | 5.406253  | 3.078396  | -0.092487 |
| C              | -3.761164 | -0.280983 | -0.218143 | C              | -3.842214 | -0.185422 | -0.204924 |
| C              | -2.259782 | 0.04493   | -0.065639 | C              | -2.333907 | 0.114068  | -0.065974 |
| O              | 1.828232  | -3.11916  | -0.350814 | O              | 1.694892  | -3.111526 | -0.256884 |
| O              | 4.735029  | 1.948921  | 0.378919  | O              | 2.731732  | 3.152369  | -0.023666 |
| O              | 3.426512  | -0.331563 | 0.892254  | O              | 3.349456  | -0.267634 | 0.780209  |
| O              | -0.005031 | -0.597743 | 0.466646  | O              | -0.090299 | -0.564485 | 0.480343  |
| O              | 1.901854  | -1.397163 | 2.352841  | O              | 1.894837  | -1.267418 | 2.35751   |
| O              | -0.944682 | -3.341476 | -1.077171 | O              | -1.086092 | -3.330542 | -0.967042 |
| O              | 2.769746  | 0.211036  | -1.810967 | O              | 2.5842    | 0.238674  | -1.922009 |
| O              | 2.796799  | 3.038804  | -0.039891 | O              | 4.606778  | 1.902956  | 0.17214   |
| H              | -4.294807 | 1.382678  | -1.544708 | H              | -4.33851  | 1.453293  | -1.575977 |
| H              | 0.698942  | -1.927495 | -2.475224 | H              | 0.567607  | -1.991145 | -2.424904 |
| H              | -0.12763  | -0.364069 | -2.368727 | H              | -0.231744 | -0.416735 | -2.382502 |
| H              | 3.474166  | -2.265224 | 1.417347  | H              | 3.427074  | -2.17971  | 1.39561   |
| H              | 1.897633  | 1.02661   | 1.290969  | H              | 1.795066  | 1.04294   | 1.253834  |
| H              | -1.958348 | -1.799295 | -1.874978 | H              | -2.087554 | -1.803473 | -1.808661 |
| H              | 1.144499  | 1.266029  | -1.006724 | H              | 1.022982  | 1.254339  | -1.103561 |
| H              | -5.81724  | 3.080799  | -1.391405 | H              | -6.114331 | 3.780943  | 0.168025  |
| H              | -7.291956 | 2.629116  | -0.51056  | H              | -5.838733 | 3.175124  | -1.479191 |
| H              | -6.085351 | 3.641259  | 0.27295   | H              | -7.327327 | 2.765414  | -0.601167 |
| H              | -7.098424 | 0.885848  | 1.441027  | H              | -7.175652 | 1.067552  | 1.393576  |
| H              | -5.511142 | 0.222655  | 1.863531  | H              | -5.601202 | 0.396415  | 1.849609  |
| H              | -5.902519 | 1.912868  | 2.21962   | H              | -5.975305 | 2.099799  | 2.158324  |
| H              | -2.693576 | -2.574015 | 1.053388  | H              | -2.823149 | -2.453054 | 1.141354  |
| H              | -1.88706  | -1.471363 | 2.187889  | H              | -1.985074 | -1.333295 | 2.235571  |

|                |           |           |           |                |           |           |           |
|----------------|-----------|-----------|-----------|----------------|-----------|-----------|-----------|
| H              | -0.998618 | -2.836275 | 1.46878   | H              | -1.133587 | -2.742858 | 1.558843  |
| H              | 2.782962  | 5.006945  | -0.522963 | H              | 6.439857  | 2.738116  | -0.052229 |
| H              | 4.223277  | 4.12001   | -1.11975  | H              | 5.220314  | 3.839564  | 0.668104  |
| H              | 4.093495  | 4.543203  | 0.6101    | H              | 5.169456  | 3.479669  | -1.080165 |
| H              | -4.134889 | -0.737576 | 0.70239   | H              | -4.222498 | -0.60588  | 0.730044  |
| H              | -3.890829 | -1.033203 | -1.010648 | H              | -3.988862 | -0.95937  | -0.973236 |
| H              | -2.123095 | 0.704065  | 0.799913  | H              | -2.180731 | 0.797382  | 0.777778  |
| H              | -1.922292 | 0.614429  | -0.942055 | H              | -1.987247 | 0.647304  | -0.961196 |
| H              | 1.039797  | -1.025726 | 2.075534  | H              | 1.009115  | -0.938923 | 2.101634  |
| H              | -0.009441 | -3.522548 | -0.862698 | H              | -0.151743 | -3.515738 | -0.752922 |
| H              | 2.318328  | 0.285197  | -2.666838 | H              | 3.365799  | -0.234321 | -1.583675 |
| <b>ent-1 e</b> |           |           |           | <b>ent-1 f</b> |           |           |           |
| C              | 1.945586  | -1.819885 | 0.795383  | C              | 1.754785  | -1.959723 | 0.108796  |
| C              | -4.065712 | 0.958879  | -0.453743 | C              | -4.62178  | 0.995091  | -0.637332 |
| C              | -4.398774 | 2.141713  | 0.088048  | C              | -5.532324 | 1.746776  | 0.002347  |
| C              | 2.594561  | 2.129989  | -0.576713 | C              | 3.483789  | 1.910998  | -0.21945  |
| C              | 0.482421  | -2.490626 | -1.232245 | C              | -0.032643 | -1.494639 | -1.697332 |
| C              | 2.347296  | -0.697    | 1.76901   | C              | 2.665217  | -1.37723  | 1.202974  |
| C              | 1.894261  | 0.926298  | 0.056622  | C              | 2.528114  | 0.787853  | 0.18767   |
| C              | -1.053518 | -2.381334 | -1.22688  | C              | -1.262051 | -2.053729 | -0.962036 |
| C              | 1.527151  | -0.141573 | -0.991761 | C              | 1.693928  | 0.282743  | -1.003203 |
| C              | 0.933502  | -1.378742 | -0.283281 | C              | 0.843122  | -0.92723  | -0.58043  |
| C              | -1.378681 | -1.838089 | 0.183311  | C              | -1.421619 | -1.092748 | 0.257457  |
| C              | -5.831585 | 2.622442  | 0.068404  | C              | -6.207861 | 2.901767  | -0.700504 |
| C              | -3.432207 | 3.095147  | 0.748655  | C              | -5.9771   | 1.542637  | 1.430609  |
| C              | -1.393421 | -2.947831 | 1.241332  | C              | -1.819542 | -1.796352 | 1.549734  |
| C              | 3.185162  | 4.395998  | -0.274789 | C              | 4.806715  | 3.699447  | 0.570857  |
| C              | -2.709187 | 0.306564  | -0.52946  | C              | -3.841787 | -0.184767 | -0.116501 |
| C              | -2.675046 | -1.015    | 0.263961  | C              | -2.326955 | 0.111092  | -0.072069 |
| O              | 2.387447  | -2.945018 | 0.901249  | O              | 1.701028  | -3.161331 | -0.090442 |
| O              | 3.176216  | 2.100193  | -1.650239 | O              | 3.868401  | 2.10308   | -1.362525 |
| O              | 2.83013   | 0.416704  | 1.015229  | O              | 3.373098  | -0.248654 | 0.704471  |
| O              | -0.254858 | -0.938237 | 0.437163  | O              | -0.068915 | -0.522237 | 0.467783  |
| O              | 1.298878  | -0.372719 | 2.636097  | O              | 1.910805  | -1.102923 | 2.35221   |
| O              | -1.734623 | -3.608317 | -1.438399 | O              | -1.11968  | -3.423951 | -0.615385 |
| O              | 2.664471  | -0.602105 | -1.697837 | O              | 2.508362  | -0.181558 | -2.064128 |
| O              | 2.505407  | 3.207421  | 0.195962  | O              | 3.854822  | 2.638769  | 0.82799   |
| H              | -4.871543 | 0.368322  | -0.895321 | H              | -4.391102 | 1.261951  | -1.670903 |
| H              | 0.787521  | -3.466166 | -0.844374 | H              | 0.471151  | -2.262992 | -2.286407 |
| H              | 0.916278  | -2.367981 | -2.226708 | H              | -0.317576 | -0.684417 | -2.37508  |
| H              | 3.199544  | -1.017152 | 2.370144  | H              | 3.435631  | -2.101981 | 1.469611  |
| H              | 0.986844  | 1.280741  | 0.558162  | H              | 1.862506  | 1.167414  | 0.971418  |
| H              | -1.369834 | -1.645181 | -1.976084 | H              | -2.155285 | -2.00011  | -1.590328 |

|                |           |           |           |                |           |           |           |
|----------------|-----------|-----------|-----------|----------------|-----------|-----------|-----------|
| H              | 0.76446   | 0.275672  | -1.66754  | H              | 1.015444  | 1.088278  | -1.323696 |
| H              | -6.204428 | 2.793577  | 1.088167  | H              | -6.020588 | 3.848291  | -0.174023 |
| H              | -5.918595 | 3.583944  | -0.457131 | H              | -5.861946 | 3.011934  | -1.733239 |
| H              | -6.497854 | 1.905298  | -0.421763 | H              | -7.29885  | 2.769226  | -0.717912 |
| H              | -3.431816 | 4.064968  | 0.231718  | H              | -5.466686 | 0.717417  | 1.932381  |
| H              | -3.73933  | 3.298615  | 1.783868  | H              | -5.804617 | 2.45366   | 2.020159  |
| H              | -2.404243 | 2.726229  | 0.770212  | H              | -7.057655 | 1.347581  | 1.474793  |
| H              | -1.460409 | -2.500974 | 2.238708  | H              | -2.785012 | -2.297649 | 1.437107  |
| H              | -0.491598 | -3.565799 | 1.200776  | H              | -1.899431 | -1.070988 | 2.366786  |
| H              | -2.256933 | -3.602184 | 1.094831  | H              | -1.081645 | -2.555102 | 1.819683  |
| H              | 3.015259  | 5.146892  | 0.494854  | H              | 4.990669  | 4.160035  | 1.539852  |
| H              | 2.760793  | 4.715965  | -1.228519 | H              | 4.380409  | 4.422323  | -0.127441 |
| H              | 4.251769  | 4.194823  | -0.392185 | H              | 5.7275    | 3.283024  | 0.157779  |
| H              | -2.476711 | 0.10878   | -1.58578  | H              | -4.189132 | -0.480381 | 0.877354  |
| H              | -1.922349 | 0.968318  | -0.159023 | H              | -4.023801 | -1.046485 | -0.775948 |
| H              | -3.484822 | -1.674004 | -0.076648 | H              | -2.135561 | 0.885556  | 0.680151  |
| H              | -2.882028 | -0.793567 | 1.31849   | H              | -2.012349 | 0.532815  | -1.035921 |
| H              | 0.463086  | -0.435594 | 2.128783  | H              | 1.038622  | -0.762174 | 2.066192  |
| H              | -1.654605 | -3.830296 | -2.379348 | H              | -0.173737 | -3.592518 | -0.442043 |
| H              | 3.10615   | 0.201669  | -2.037211 | H              | 3.137622  | 0.543818  | -2.249631 |
| <b>ent-1 g</b> |           |           |           | <b>ent-1 h</b> |           |           |           |
| C              | 1.887079  | -2.021012 | 0.563639  | C              | 2.162745  | -1.726612 | 0.203816  |
| C              | -4.483621 | 1.200771  | -0.387494 | C              | -3.780895 | 1.102577  | -0.131432 |
| C              | -5.583447 | 1.458321  | 0.338755  | C              | -5.074691 | 1.289702  | 0.176621  |
| C              | 3.543415  | 1.892812  | 0.161088  | C              | 2.522743  | 2.566527  | 0.144958  |
| C              | 0.505957  | -1.812603 | -1.613245 | C              | 0.538246  | -1.714437 | -1.79905  |
| C              | 2.495478  | -1.275953 | 1.765675  | C              | 3.035341  | -0.921663 | 1.188925  |
| C              | 2.581031  | 0.755735  | 0.494248  | C              | 2.113023  | 1.118296  | 0.388629  |
| C              | -0.948657 | -1.306683 | -1.634874 | C              | -0.577754 | -2.62248  | -1.250301 |
| C              | 2.060122  | 0.083753  | -0.789574 | C              | 1.490241  | 0.487338  | -0.865475 |
| C              | 1.128353  | -1.100515 | -0.41469  | C              | 1.059506  | -0.966704 | -0.56591  |
| C              | -1.268274 | -1.016302 | -0.148095 | C              | -1.138945 | -1.799631 | -0.047282 |
| C              | -6.260037 | 2.807594  | 0.259904  | C              | -5.908265 | 2.29948   | -0.578506 |
| C              | -6.253027 | 0.481192  | 1.274998  | C              | -5.822079 | 0.554819  | 1.263456  |
| C              | -1.684706 | -2.268816 | 0.626098  | C              | -1.52379  | -2.659691 | 1.152082  |
| C              | 3.653414  | 4.033691  | -0.833879 | C              | 1.65623   | 4.715326  | -0.320712 |
| C              | -3.669532 | -0.065692 | -0.449589 | C              | -2.790634 | 0.150805  | 0.487931  |
| C              | -2.230418 | 0.162256  | 0.061229  | C              | -2.296397 | -0.897609 | -0.529214 |
| O              | 2.010209  | -3.220216 | 0.422811  | O              | 2.328749  | -2.93163  | 0.117337  |
| O              | 4.735598  | 1.889013  | 0.371154  | O              | 3.660147  | 2.980594  | 0.117762  |
| O              | 3.306959  | -0.206499 | 1.259839  | O              | 3.302184  | 0.38372   | 0.698489  |
| O              | 0.024351  | -0.544026 | 0.357986  | O              | -0.028961 | -0.931578 | 0.374668  |
| O              | 1.516092  | -0.856989 | 2.667833  | O              | 2.36223   | -0.919583 | 2.41614   |



|                |           |           |           |                |           |           |           |
|----------------|-----------|-----------|-----------|----------------|-----------|-----------|-----------|
| O              | -1.87443  | -2.242535 | -2.166849 | O              | -0.11736  | -3.923355 | -0.920816 |
| O              | 3.146482  | -0.359854 | -1.588735 | O              | 2.414718  | 0.538109  | -1.943581 |
| O              | 2.867495  | 2.894824  | -0.419511 | O              | 1.427291  | 3.315499  | -0.048049 |
| H              | -4.104214 | 2.006506  | -1.019894 | H              | -3.372412 | 1.70249   | -0.947982 |
| H              | 0.515678  | -2.895089 | -1.458225 | H              | 1.309043  | -2.290336 | -2.314858 |
| H              | 1.04915   | -1.59635  | -2.536136 | H              | 0.13437   | -0.988165 | -2.510367 |
| H              | 3.193288  | -1.928206 | 2.292272  | H              | 4.01603   | -1.402906 | 1.253337  |
| H              | 1.743837  | 1.16618   | 1.068288  | H              | 1.404424  | 1.079764  | 1.222274  |
| H              | -1.006276 | -0.360527 | -2.19072  | H              | -1.367888 | -2.771515 | -1.991825 |
| H              | 1.49206   | 0.80161   | -1.387094 | H              | 0.603109  | 1.046939  | -1.172097 |
| H              | -6.297474 | 3.288608  | 1.247505  | H              | -6.77259  | 1.818922  | -1.058517 |
| H              | -5.745052 | 3.484262  | -0.429566 | H              | -6.317267 | 3.061772  | 0.099777  |
| H              | -7.302532 | 2.707995  | -0.074204 | H              | -5.328779 | 2.810278  | -1.354255 |
| H              | -5.735144 | -0.477999 | 1.346808  | H              | -6.217954 | 1.261257  | 2.006434  |
| H              | -6.320874 | 0.904067  | 2.286853  | H              | -6.691751 | 0.029487  | 0.844781  |
| H              | -7.28545  | 0.283567  | 0.954228  | H              | -5.209582 | -0.179143 | 1.792077  |
| H              | -0.935585 | -3.061392 | 0.537121  | H              | -1.797846 | -2.031934 | 2.004699  |
| H              | -2.6325   | -2.662418 | 0.251009  | H              | -0.692493 | -3.303426 | 1.446584  |
| H              | -1.803213 | -2.023883 | 1.687039  | H              | -2.377808 | -3.29871  | 0.903644  |
| H              | 2.943248  | 4.728474  | -1.279894 | H              | 0.666484  | 5.14993   | -0.45301  |
| H              | 4.404335  | 3.727761  | -1.565607 | H              | 2.252217  | 4.830878  | -1.228603 |
| H              | 4.144443  | 4.486931  | 0.029964  | H              | 2.172718  | 5.183443  | 0.520146  |
| H              | -4.142842 | -0.868511 | 0.123338  | H              | -1.919878 | 0.71762   | 0.844899  |
| H              | -3.624207 | -0.417012 | -1.489308 | H              | -3.217966 | -0.349521 | 1.361804  |
| H              | -2.260687 | 0.400265  | 1.132156  | H              | -1.978777 | -0.37854  | -1.443799 |
| H              | -1.798358 | 1.03644   | -0.442693 | H              | -3.134195 | -1.545124 | -0.818977 |
| H              | 0.721207  | -0.607687 | 2.152364  | H              | 2.98815   | -0.6203   | 3.098158  |
| H              | -1.736494 | -2.279372 | -3.126717 | H              | 0.77562   | -3.824673 | -0.535063 |
| H              | 3.822834  | -0.725278 | -0.990284 | H              | 3.295288  | 0.341032  | -1.576056 |
| <i>ent-1 i</i> |           |           |           | <i>ent-1 j</i> |           |           |           |
| C              | -1.679462 | -1.89912  | 0.330398  | C              | 1.95379   | -1.821491 | 0.131041  |
| C              | 4.593777  | 1.158726  | -0.878708 | C              | -4.236245 | 0.679919  | 0.295139  |
| C              | 5.495251  | 1.685743  | -0.034392 | C              | -4.369554 | 1.982647  | -0.002626 |
| C              | -3.392932 | 1.989167  | -0.195006 | C              | 2.397167  | 2.38893   | -0.241844 |
| C              | 0.321112  | -0.938828 | 1.655126  | C              | 0.147708  | -1.956179 | -1.712787 |
| C              | -2.760202 | -1.644053 | -0.733231 | C              | 2.615936  | -0.970778 | 1.228416  |
| C              | -2.578448 | 0.714239  | -0.40146  | C              | 1.830221  | 1.031168  | 0.175288  |
| C              | 1.459345  | -1.68755  | 0.939648  | C              | -0.864064 | -2.860497 | -0.98933  |
| C              | -1.5595   | 0.572485  | 0.737664  | C              | 1.230409  | 0.272791  | -1.023897 |
| C              | -0.72398  | -0.713611 | 0.561615  | C              | 0.779855  | -1.132987 | -0.590655 |
| C              | 1.410042  | -1.115718 | -0.51206  | C              | -1.341865 | -1.974899 | 0.207547  |
| C              | 6.164101  | 3.004566  | -0.346752 | C              | -5.693724 | 2.531724  | -0.481995 |
| C              | 5.936679  | 1.058795  | 1.266195  | C              | -3.271371 | 3.013297  | 0.104337  |

|   |           |           |           |   |           |           |           |
|---|-----------|-----------|-----------|---|-----------|-----------|-----------|
| C | 1.655294  | -2.161101 | -1.59405  | C | -1.545546 | -2.758466 | 1.49932   |
| C | -5.51503  | 2.968524  | 0.062236  | C | 2.784274  | 4.617887  | 0.43305   |
| C | 3.819853  | -0.12789  | -0.748386 | C | -3.014813 | -0.055803 | 0.782187  |
| C | 2.299987  | 0.133855  | -0.669444 | C | -2.583386 | -1.158978 | -0.205091 |
| O | -1.547531 | -2.99494  | 0.848514  | O | 2.278486  | -2.983312 | -0.044588 |
| O | -2.85194  | 3.074549  | -0.109622 | O | 2.935283  | 2.598261  | -1.318459 |
| O | -3.432815 | -0.423375 | -0.467351 | O | 2.946126  | 0.318132  | 0.724375  |
| O | 0.019723  | -0.628129 | -0.677872 | O | -0.233376 | -1.020033 | 0.436258  |
| O | -2.188744 | -1.708813 | -2.014167 | O | 1.789838  | -0.935099 | 2.360424  |
| O | 1.325833  | -3.098103 | 1.022073  | O | -0.309926 | -4.113129 | -0.615653 |
| O | -2.302645 | 0.491457  | 1.948938  | O | 2.185166  | 0.057227  | -2.04667  |
| O | -4.707751 | 1.785394  | -0.129285 | O | 2.245001  | 3.302137  | 0.710188  |
| H | 4.366299  | 1.725591  | -1.784003 | H | -5.118223 | 0.047898  | 0.169215  |
| H | -0.06038  | -1.507258 | 2.5057    | H | 0.877892  | -2.53607  | -2.27991  |
| H | 0.67568   | 0.029826  | 2.02257   | H | -0.360131 | -1.281334 | -2.407906 |
| H | -3.528773 | -2.415567 | -0.670297 | H | 3.568721  | -1.415419 | 1.518939  |
| H | -2.033495 | 0.844569  | -1.345415 | H | 1.06127   | 1.192803  | 0.937826  |
| H | 2.427231  | -1.455916 | 1.391793  | H | -1.719842 | -3.094105 | -1.629172 |
| H | -0.890973 | 1.440875  | 0.720921  | H | 0.350229  | 0.826047  | -1.387061 |
| H | 5.97145   | 3.74196   | 0.445229  | H | -6.060334 | 3.321152  | 0.189358  |
| H | 7.255872  | 2.889969  | -0.402155 | H | -5.594112 | 2.993235  | -1.474613 |
| H | 5.817525  | 3.42564   | -1.295981 | H | -6.461524 | 1.753782  | -0.543391 |
| H | 5.745584  | 1.74134   | 2.105847  | H | -3.108613 | 3.50444   | -0.865039 |
| H | 5.439387  | 0.111101  | 1.48535   | H | -3.554997 | 3.808225  | 0.80816   |
| H | 7.020257  | 0.876174  | 1.258496  | H | -2.316523 | 2.598369  | 0.435299  |
| H | 2.641838  | -2.61799  | -1.476271 | H | -1.763792 | -2.084214 | 2.332419  |
| H | 1.603919  | -1.698948 | -2.58588  | H | -0.655193 | -3.342064 | 1.742795  |
| H | 0.911775  | -2.959183 | -1.535743 | H | -2.385195 | -3.45284  | 1.390928  |
| H | -5.364119 | 3.667323  | -0.763382 | H | 2.562647  | 5.210227  | 1.318959  |
| H | -5.25493  | 3.453651  | 1.005565  | H | 2.29918   | 5.041077  | -0.448649 |
| H | -6.544571 | 2.614094  | 0.083128  | H | 3.861586  | 4.552466  | 0.268949  |
| H | 4.027651  | -0.75487  | -1.626312 | H | -2.174279 | 0.623328  | 0.948997  |
| H | 4.149767  | -0.701398 | 0.124208  | H | -3.246226 | -0.513108 | 1.754569  |
| H | 1.97565   | 0.652951  | -1.579945 | H | -2.395985 | -0.698188 | -1.183673 |
| H | 2.098438  | 0.818991  | 0.163832  | H | -3.411773 | -1.865373 | -0.349654 |
| H | -1.298269 | -1.305231 | -1.968916 | H | 0.860698  | -0.890295 | 2.05473   |
| H | 0.372651  | -3.309799 | 1.029426  | H | 0.637209  | -3.976592 | -0.421557 |
| H | -1.713832 | 0.718426  | 2.686051  | H | 2.641775  | 0.913367  | -2.176127 |

**Table S7.** Deviations between the calculated and experimental  $^{13}\text{C}$  NMR chemical shifts of **1** at B3LYP/6-311++G(d,p) level in DMSO

| No. | Experimental | Calculated | Calibration | $\Delta\delta$ |
|-----|--------------|------------|-------------|----------------|
| 2   | 85.2         | 86.5       | 84.7374     | -1.7516        |
| 3   | 74.4         | 76.0       | 73.9482     | -2.0588        |
| 4   | 34.7         | 37.6       | 34.2879     | -3.3059        |
| 5   | 82.7         | 82.9       | 82.2399     | -0.6827        |
| 6   | 195.7        | 197.9      | 195.1269    | -2.7861        |
| 7   | 99.2         | 97.1       | 98.7234     | 1.6204         |
| 9   | 66.6         | 66.7       | 66.156      | -0.4989        |
| 10  | 75.0         | 76.9       | 74.5476     | -2.3491        |
| 11  | 40.1         | 41.4       | 39.6825     | -1.7054        |
| 12  | 22.2         | 22.5       | 21.8004     | -0.6989        |
| 13  | 124.7        | 121.5      | 124.1979    | 2.6819         |
| 14  | 130.7        | 132.8      | 130.1919    | -2.6541        |
| 15  | 25.6         | 25.3       | 25.197      | -0.1506        |
| 16  | 17.6         | 18.8       | 17.205      | -1.5597        |
| 17  | 20.3         | 19.2       | 19.9023     | 0.6705         |
| 18  | 175.0        | 175.0      | 174.4476    | -0.5414        |
| 19  | 56.1         | 55.4       | 55.6665     | 0.2284         |

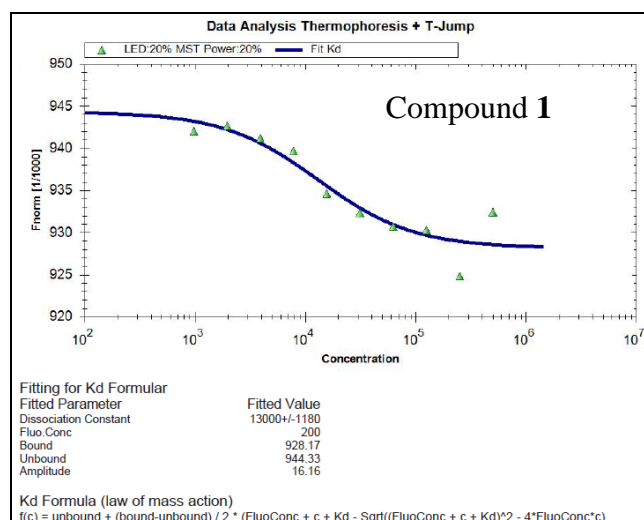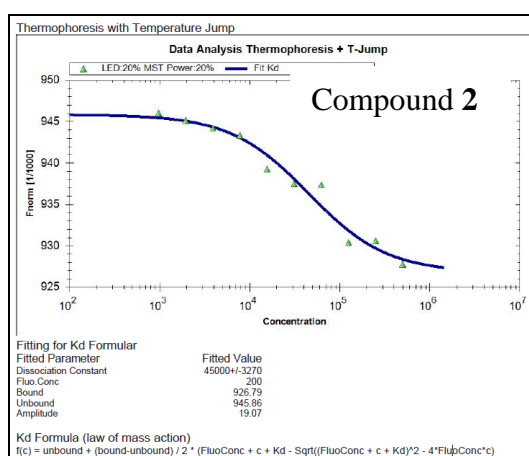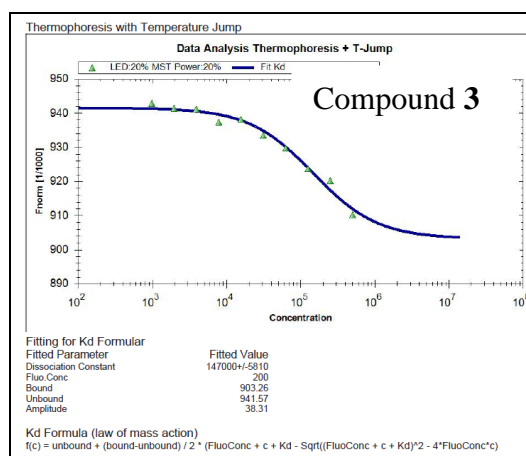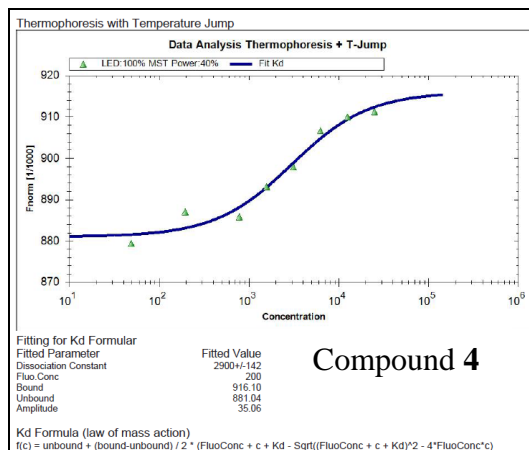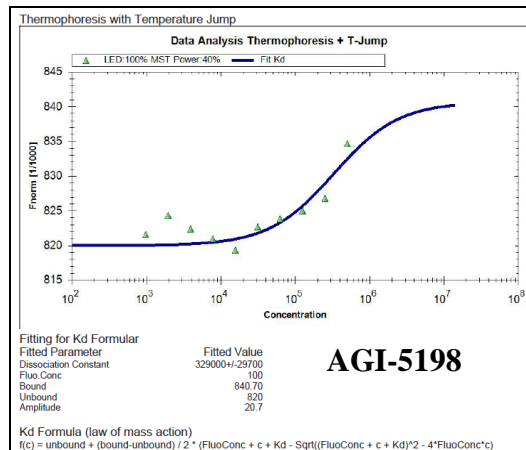

**Figure S1.** Measurement of affinity between compounds 1–4 and AGI-5198 with IDH1<sup>R132H</sup> by MST in standard treated capillaries, the resulting binding curves of the tested compounds were shown. From the resulting binding curve,  $K_d$  of  $13.0 \pm 1.18 \mu\text{M}$  for 1,  $45.0 \pm 3.27 \mu\text{M}$  for 2,  $147.0 \pm 5.81 \mu\text{M}$  for 3,  $329.0 \pm 2.97 \mu\text{M}$  for 4, and  $2.90 \pm 0.14 \mu\text{M}$  for AGI-5198 (as a reference), were calculated

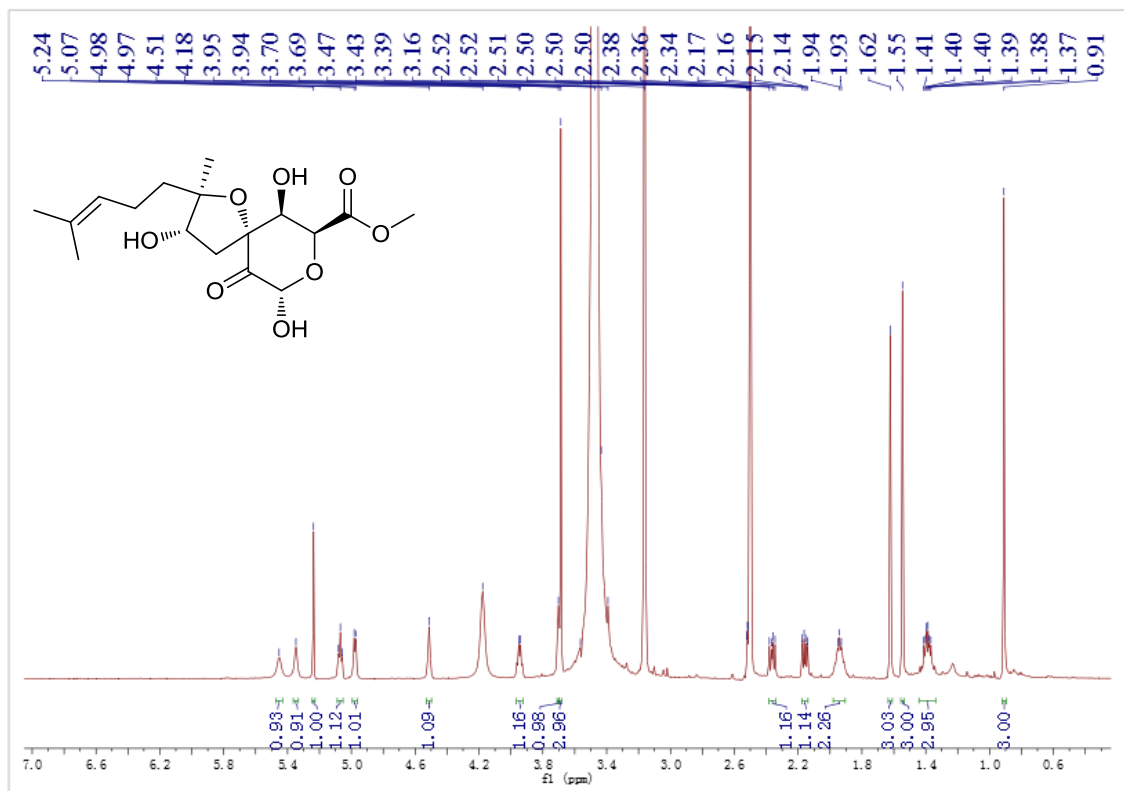

Figure S2.  $^1\text{H}$  NMR spectrum (DMSO- $d_6$ , 400 MHz) of compound 1

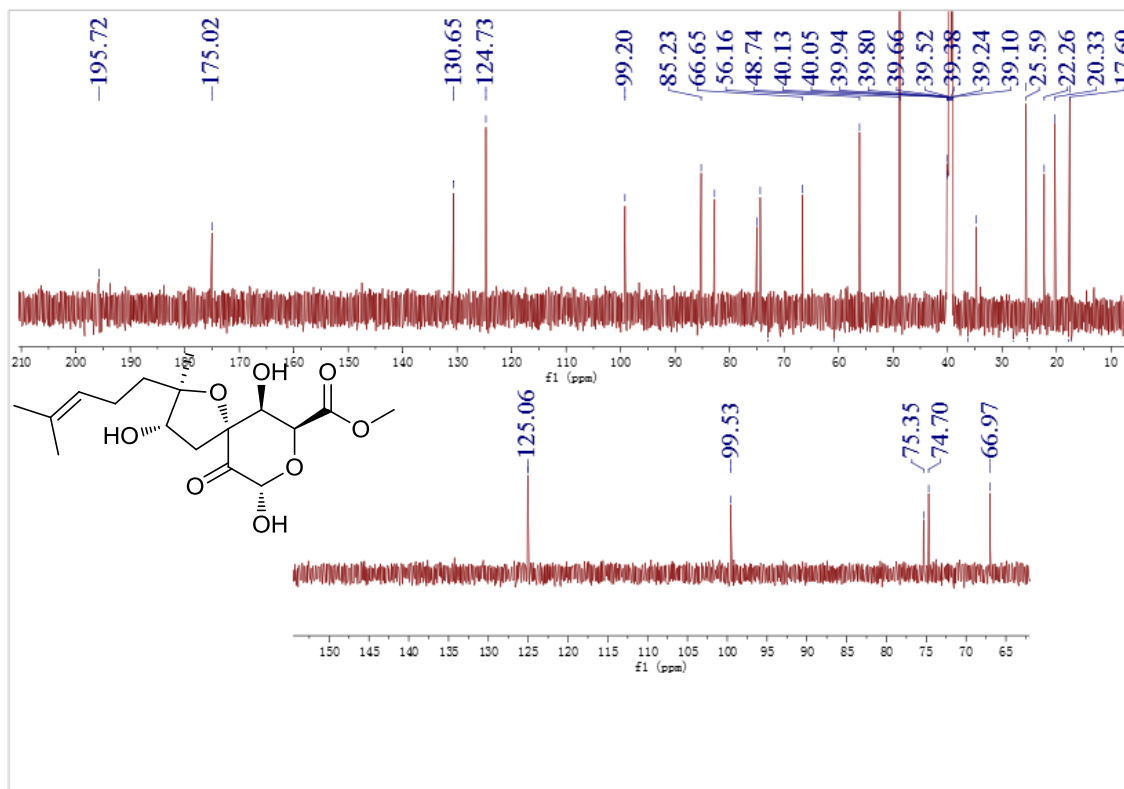

Figure S3.  $^{13}\text{C}$  NMR spectrum (DMSO- $d_6$ , 100 MHz) of compound 1

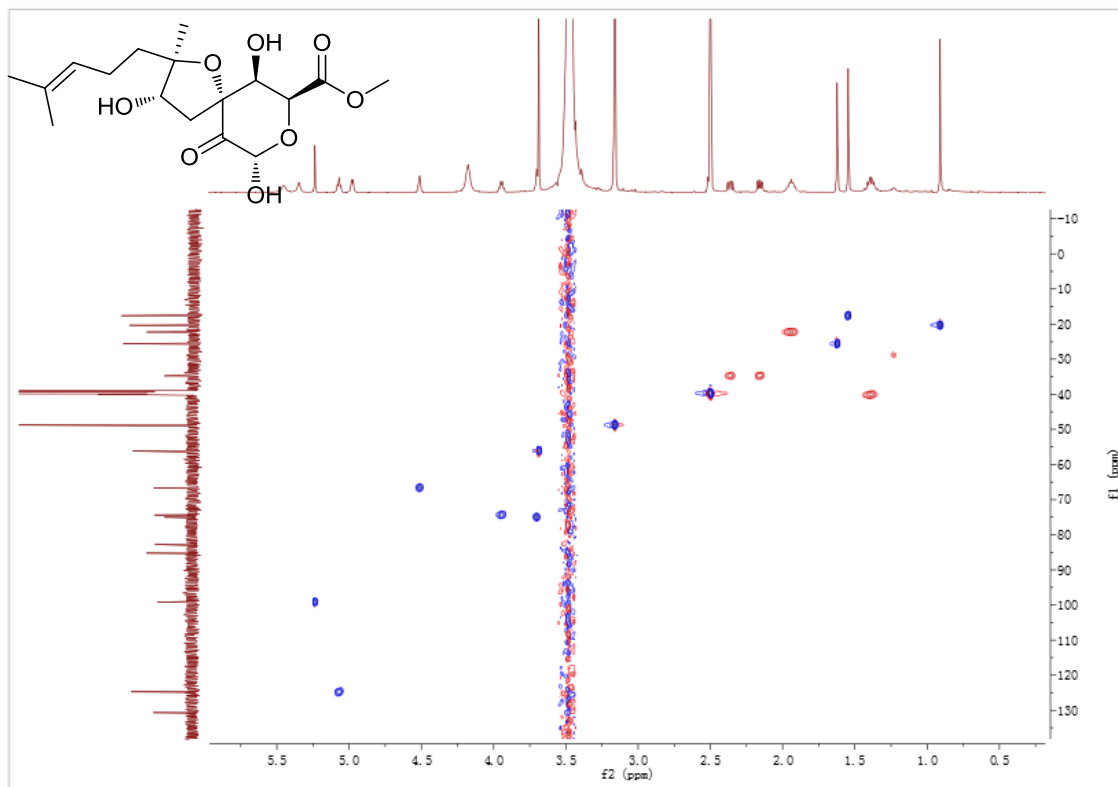

**Figure S4.** HMQC spectrum of compound **1** (in DMSO- $d_6$ )

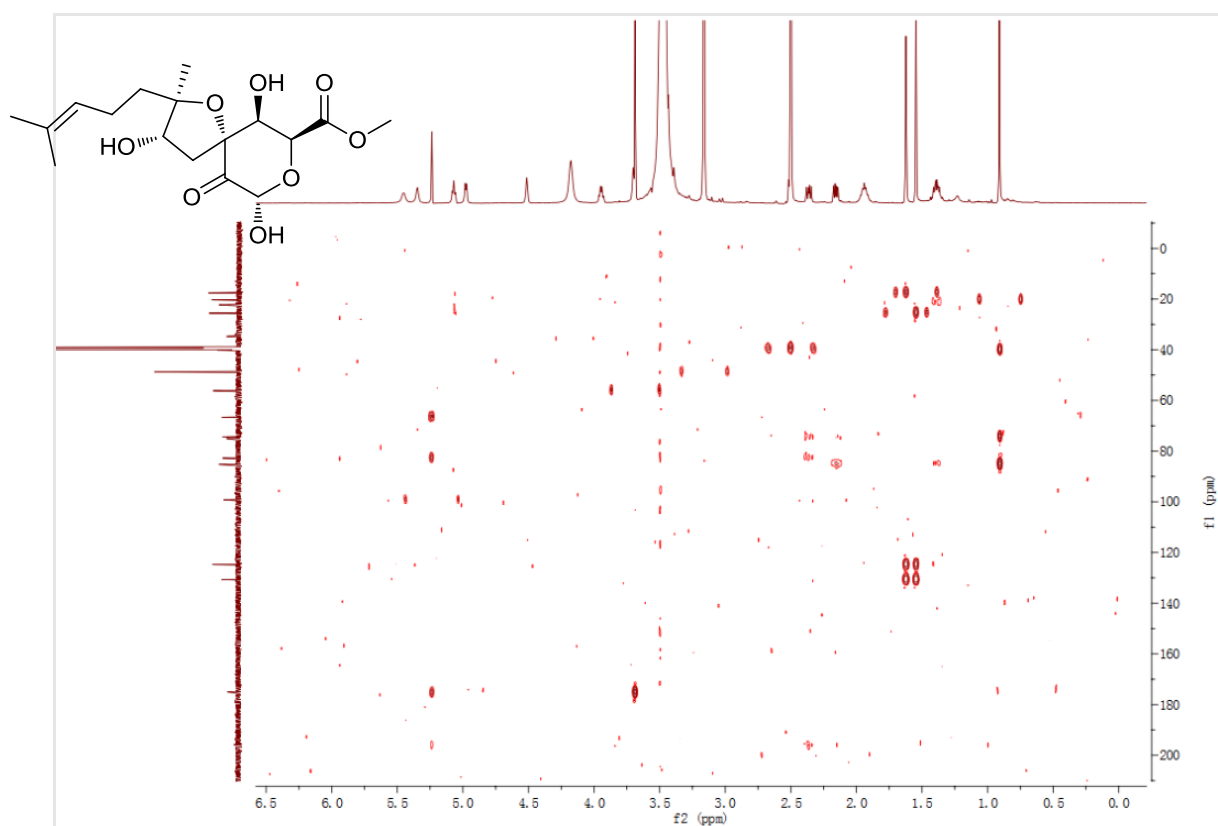

**Figure S5.** HMBC spectrum of compound **1** (in DMSO- $d_6$ )

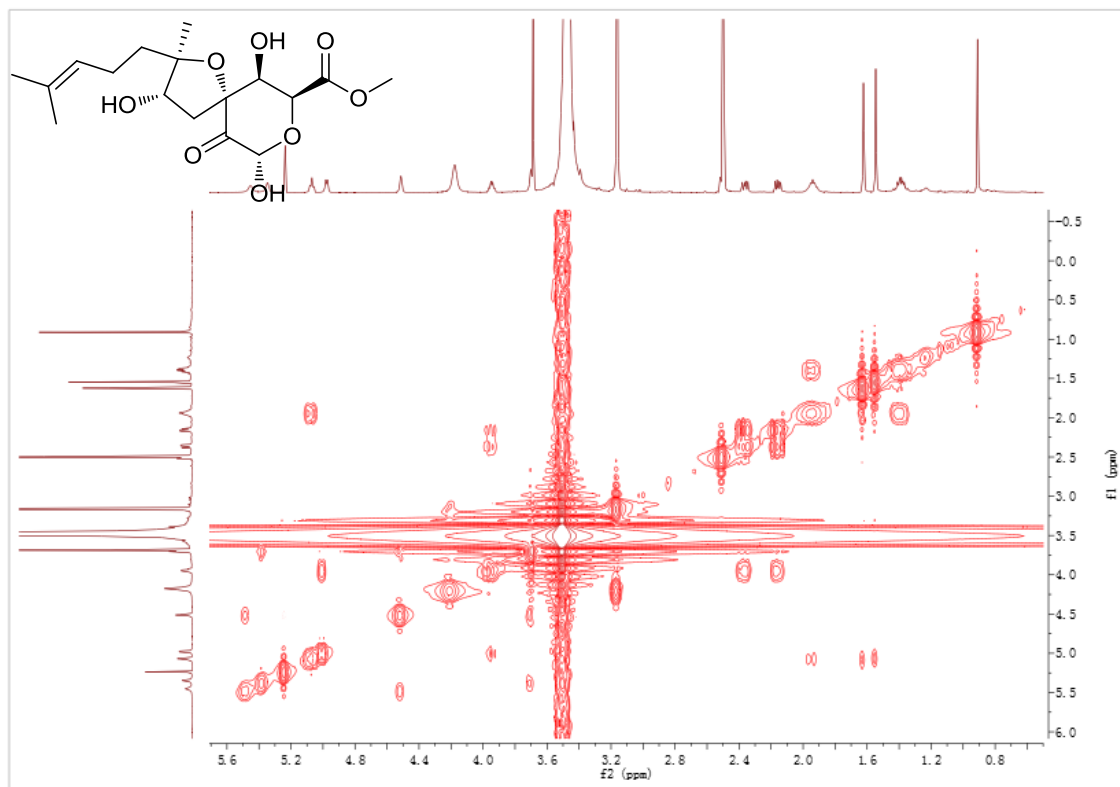

**Figure S6.**  $^1\text{H}$ - $^1\text{H}$  COSY spectrum of compound **1** (in  $\text{DMSO-}d_6$ )

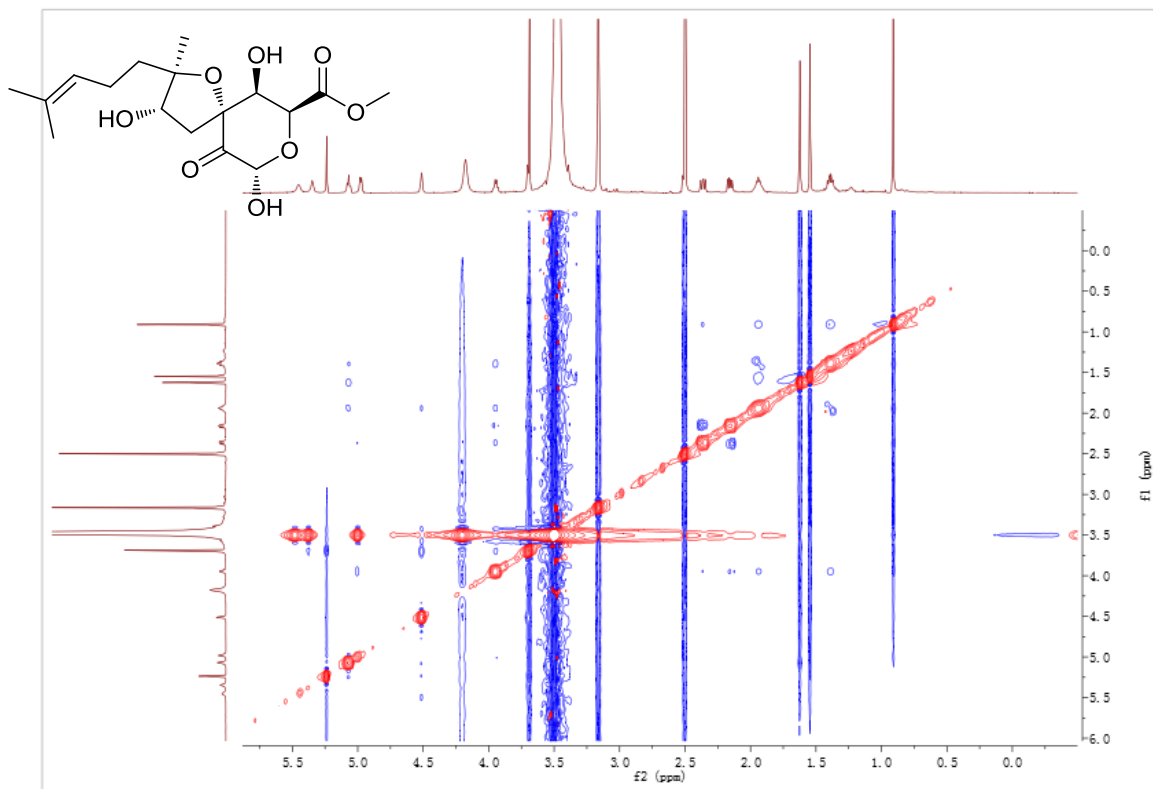

**Figure S7.** NOESY spectrum of compound **1** (in  $\text{DMSO-}d_6$ )

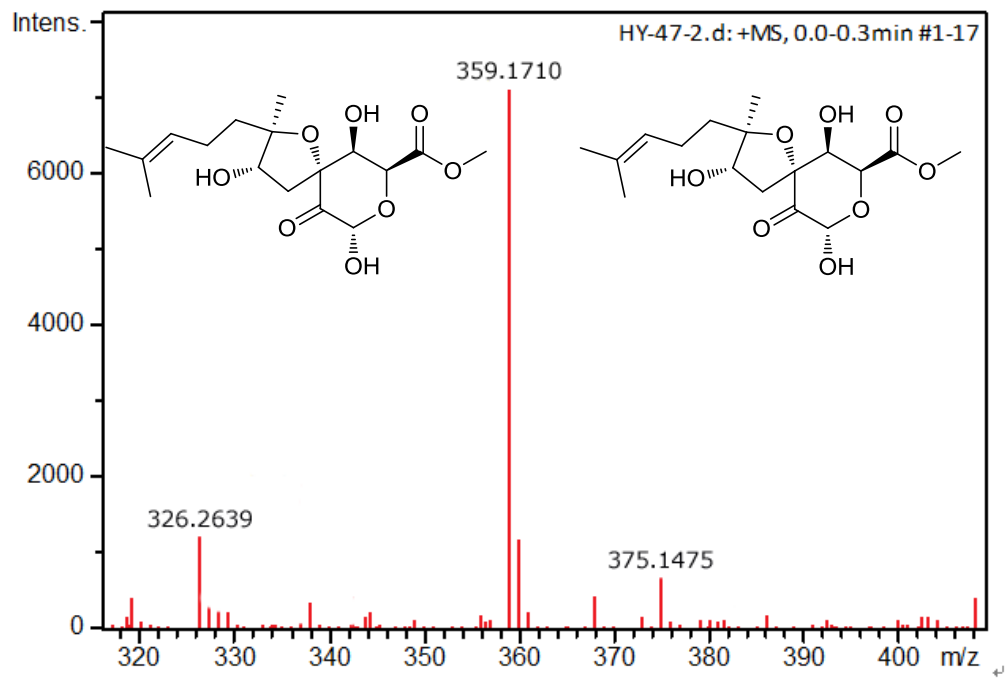

**Figure S8.** HRESIMS spectrum of compound **1**

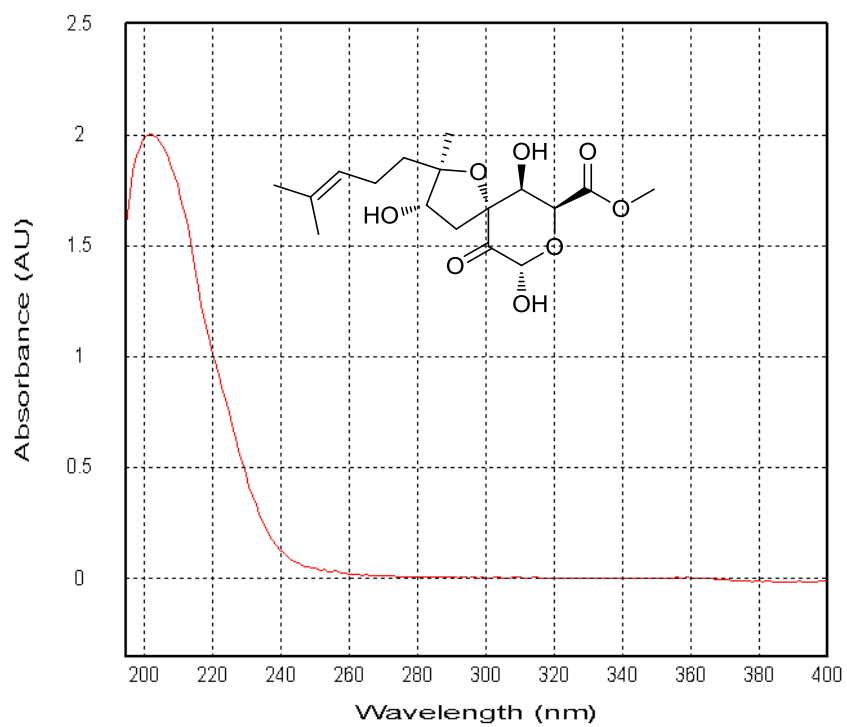

**Figure S9.** UV spectrum of compound **1**



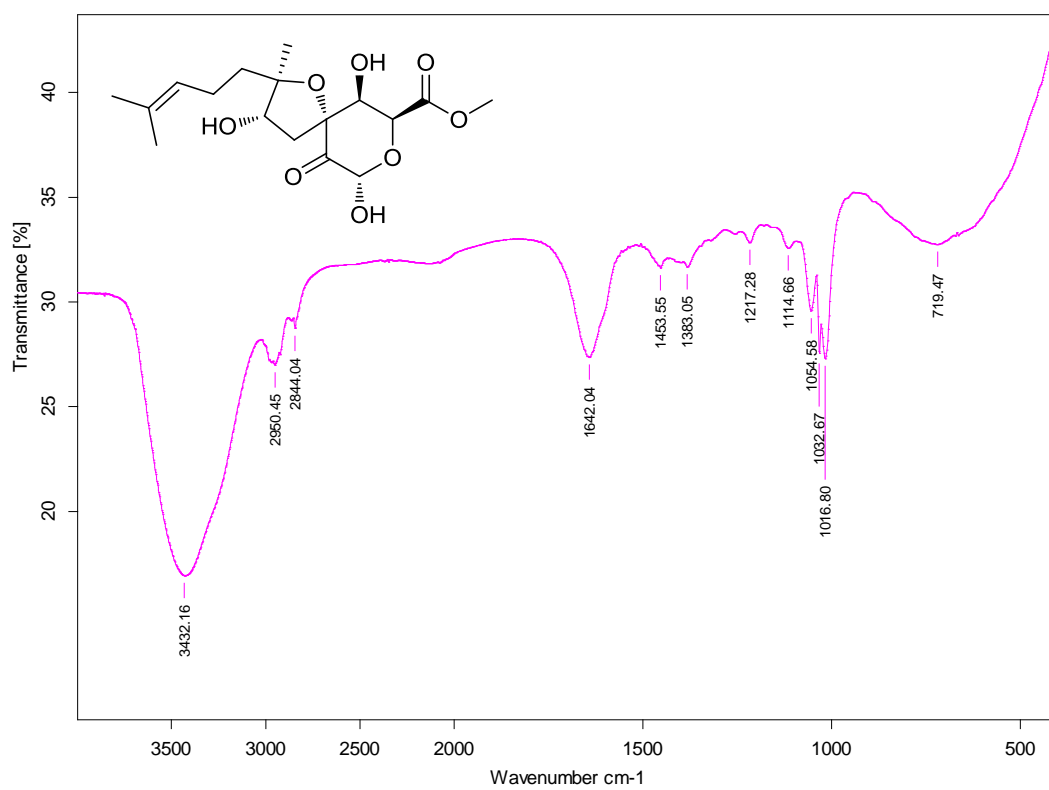

**Figure S10.** IR spectrum of compound **1**

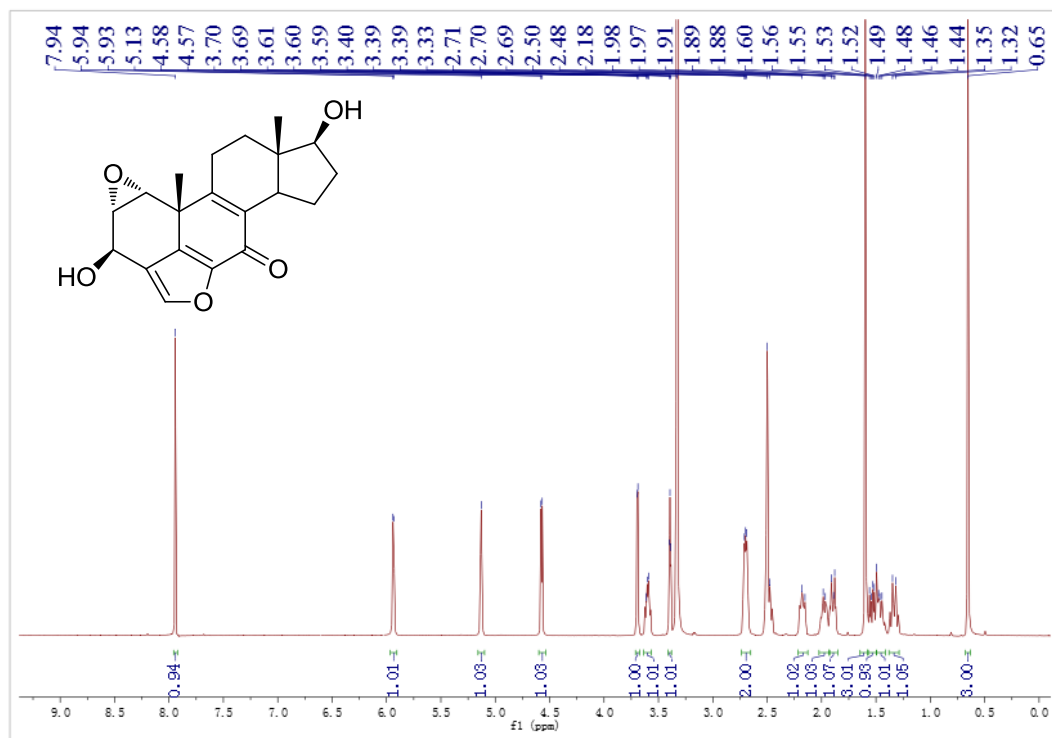

**Figure S11.** <sup>1</sup>H NMR spectrum (DMSO-*d*<sub>6</sub>, 400 MHz) of compound **2**

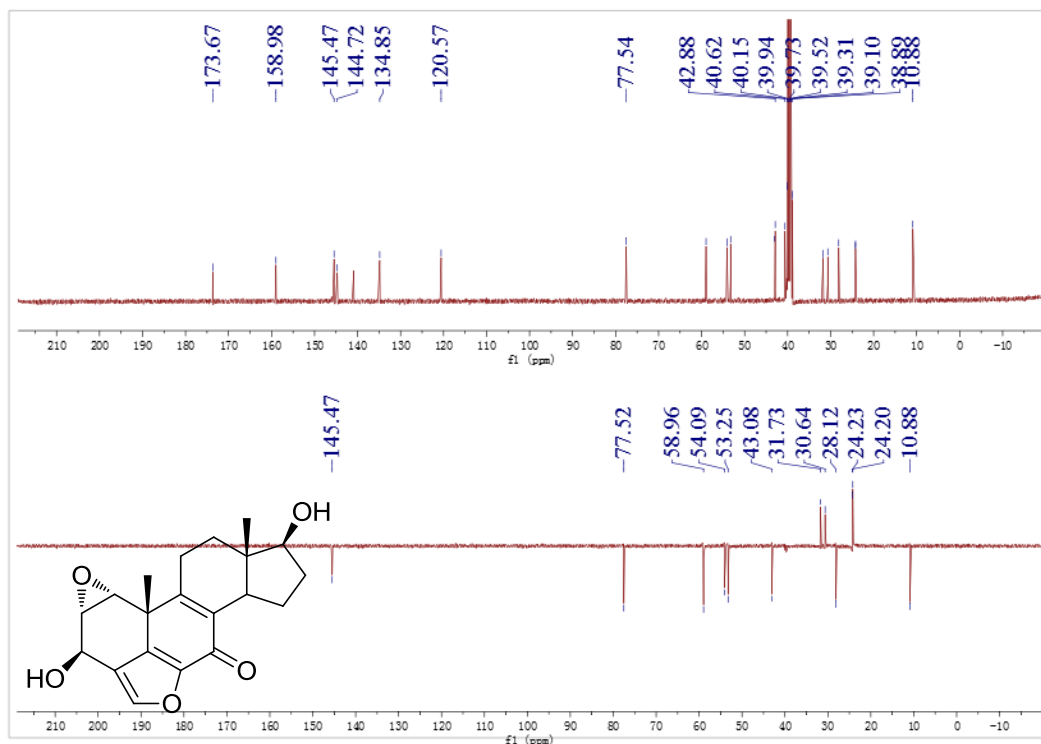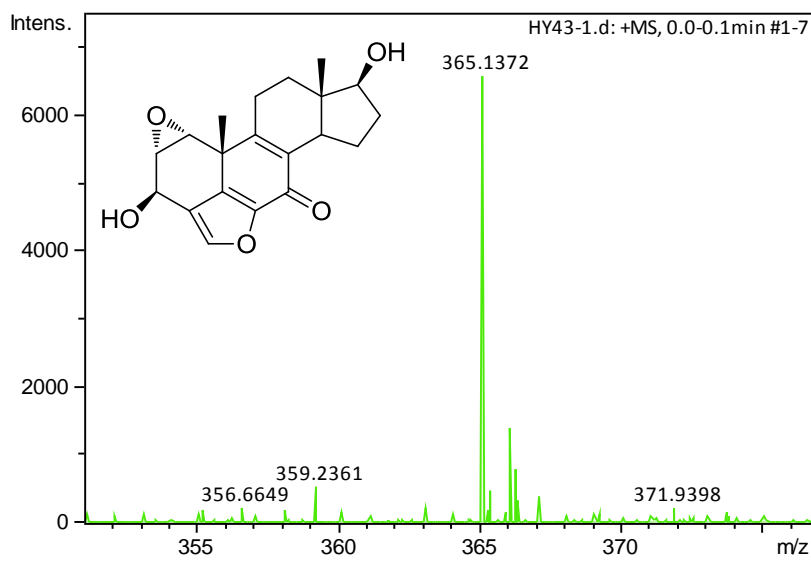

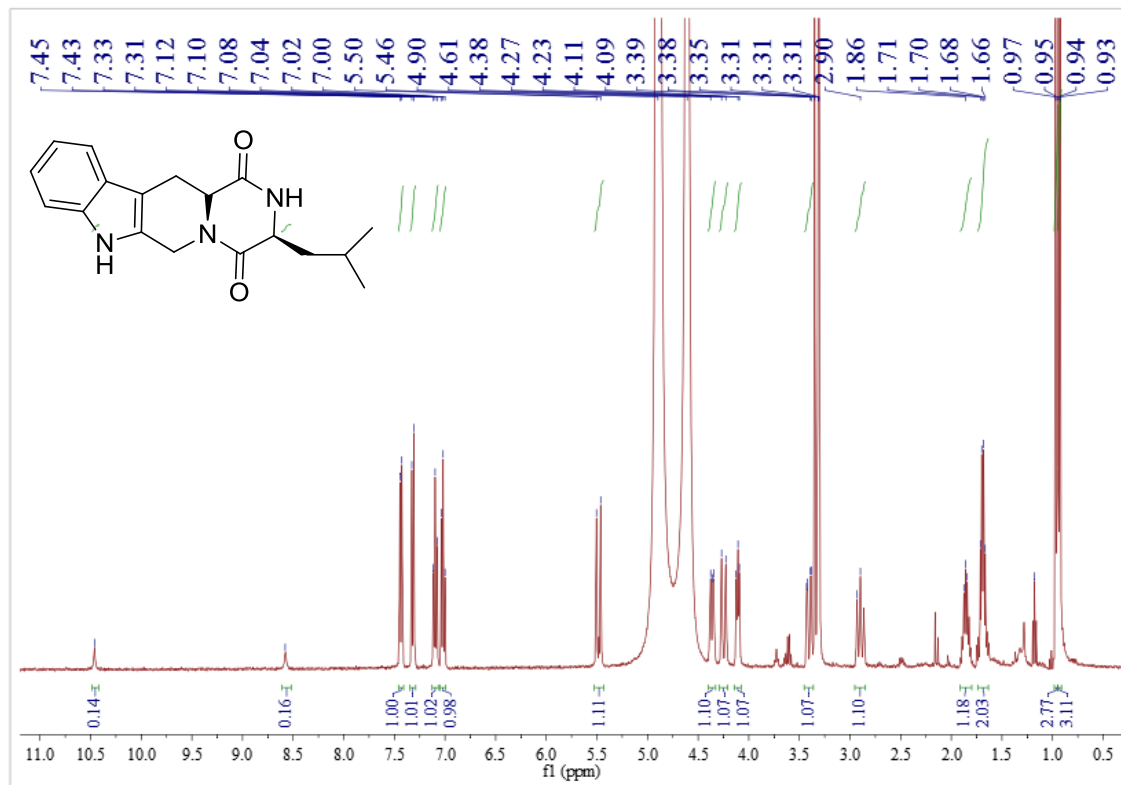

Figure S14.  $^1\text{H}$  NMR spectrum ( $\text{CD}_3\text{OD}$ , 400 MHz) of compound 3

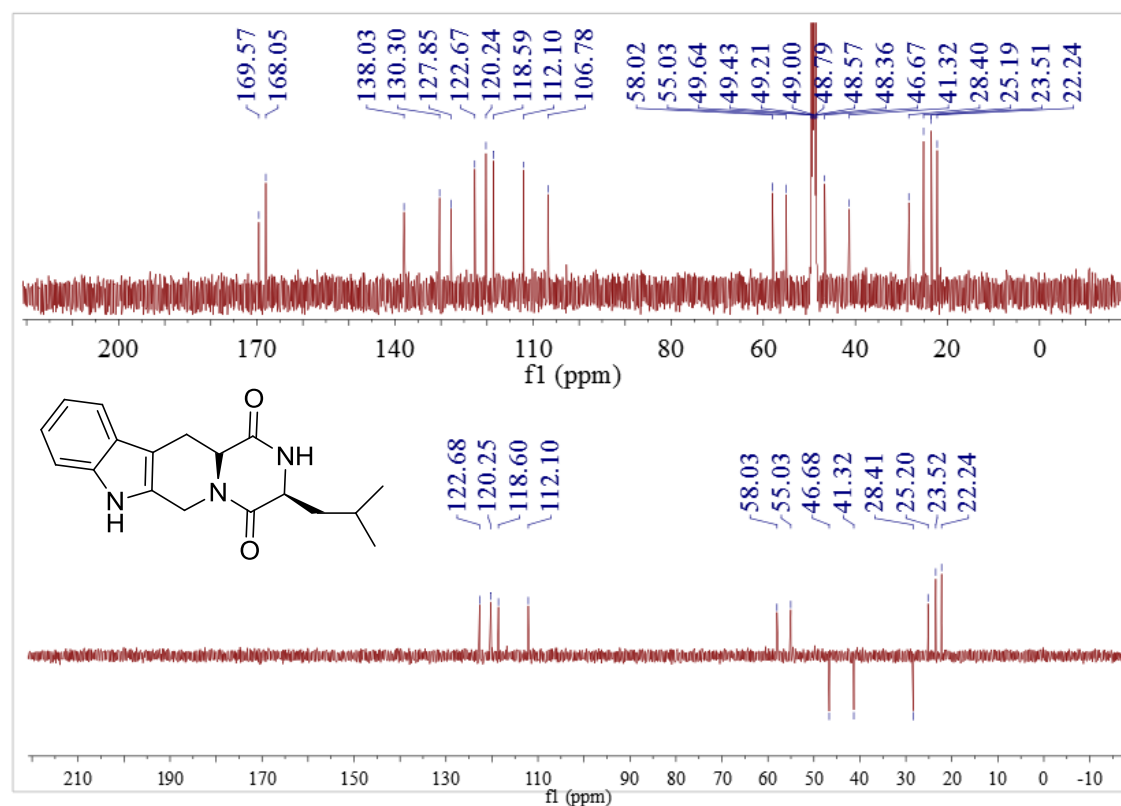

Figure S15.  $^{13}\text{C}$  NMR spectrum ( $\text{CD}_3\text{OD}$ , 100 MHz) of compound 3

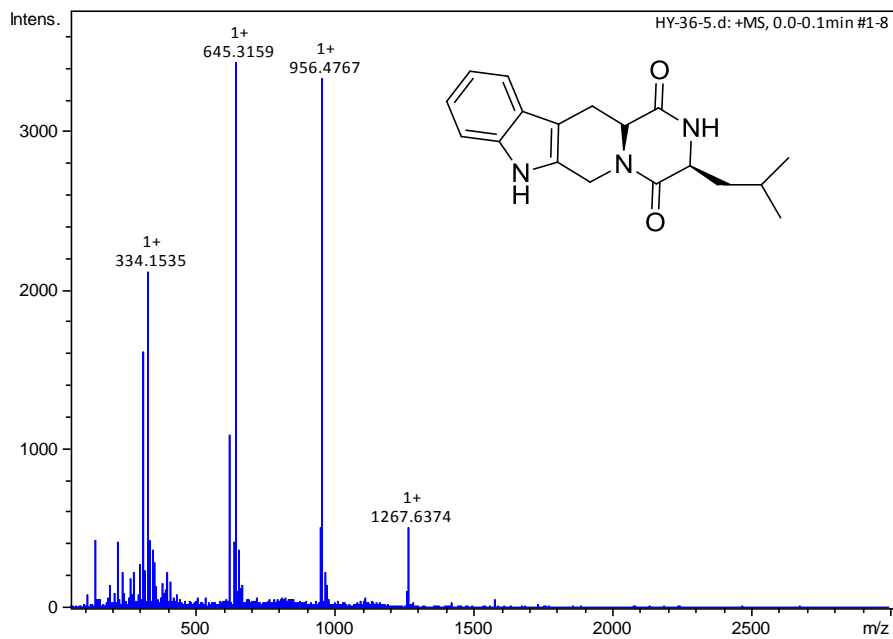

**Figure S16.** HRESIMS spectrum of compound **3**

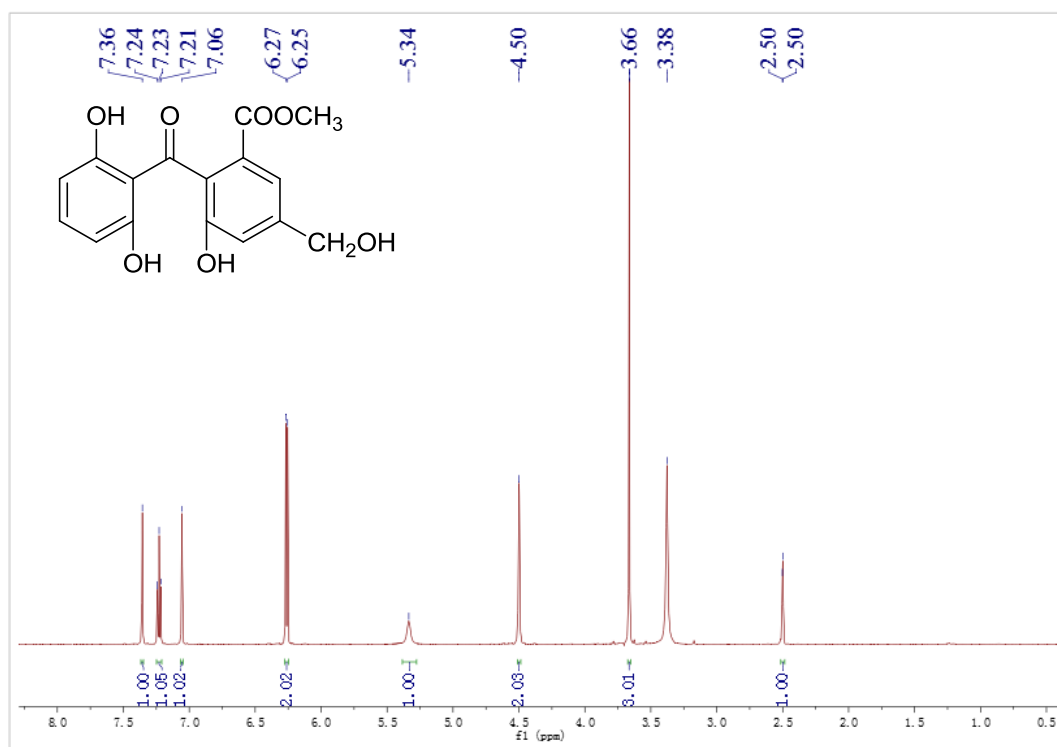

**Figure S17.**  $^1\text{H}$  NMR spectrum ( $\text{DMSO-}d_6$ , 400 MHz) of compound **4**

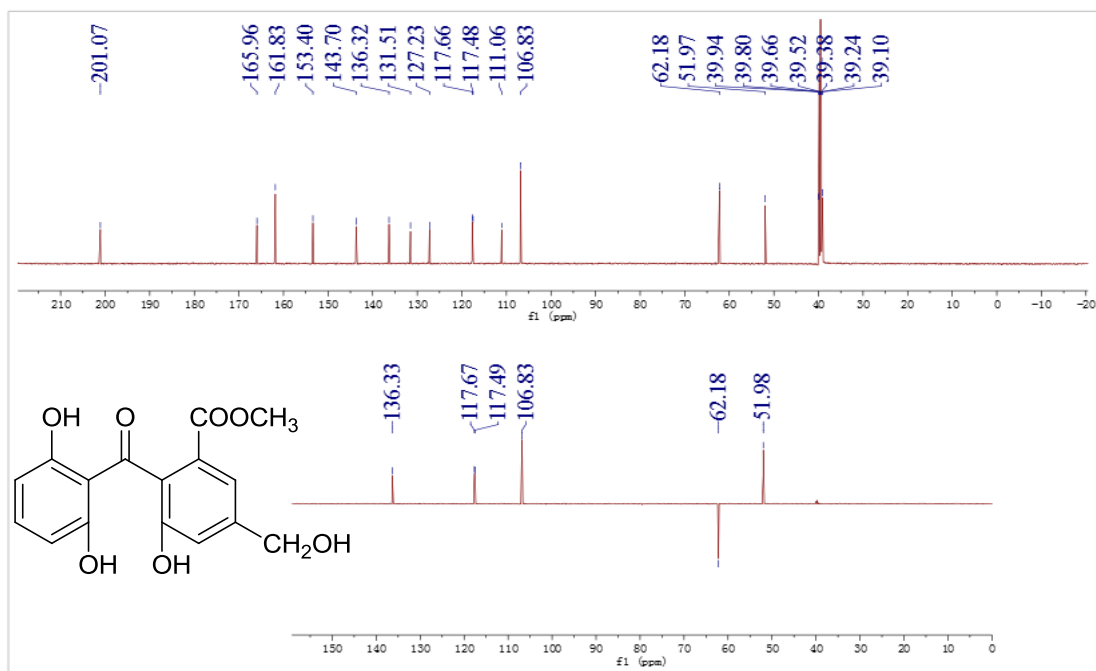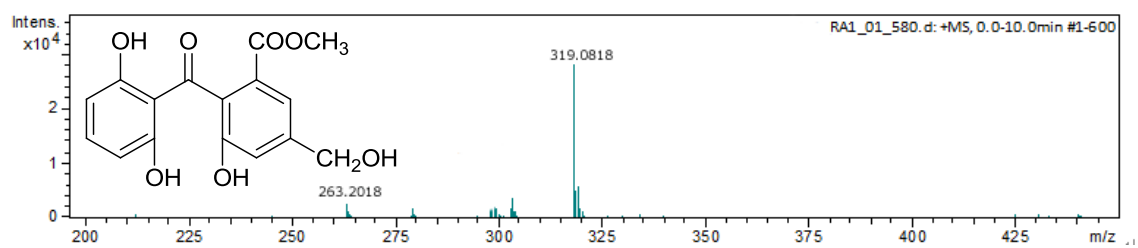

Supplement: c6qo00847j1.pdf [file c6qo00847j1.pdf]
